# Supplementary material for: Plasma and Urinary Metabolomic Analysis of Gout and Asymptomatic Hyperuricemia and Profiling of Potential Biomarkers: A Pilot Study
Source: MDPI journal article supplement (doi:10.3390/biomedicines12020300), 2024-01-27
Supplement: s1 [file s1]

**Table S1. Summary of metabolites detected by GC-MS/MS in this study.**

| Compound name [arb.unit]                             | Sample        | Median (IQR: Q1-Q3) |                  |                       | Raw <i>P</i>     |
|------------------------------------------------------|---------------|---------------------|------------------|-----------------------|------------------|
|                                                      |               | All (n = 42)        | AHU (n = 9)      | Overall gout (n = 33) |                  |
| <b>2-Isopropylmalic acid-3TMS</b>                    | <b>Plasma</b> | <b>1</b>            | <b>1</b>         | <b>1</b>              | <b>Reference</b> |
| 1,5-Anhydro-glucitol-4TMS ( $\times 10^{-2}$ )       | Plasma        | 0.63 (0–1.00)       | 0.86 (0.67–1.48) | 0.54 (0–0.95)         | <b>0.037</b>     |
| 1,6-Anhydroglucose-3TMS ( $\times 10^{-2}$ )         | Plasma        | 0.73 (0–0.96)       | 0.63 (0–1.07)    | 0.83 (0–0.97)         | 0.741            |
| 1-Hexadecanol-TMS ( $\times 10^{-2}$ )               | Plasma        | 2.16 (0–2.66)       | 2.46 (2.09–2.53) | 2.05 (1.63–2.62)      | 0.490            |
| 2-Aminoadipic acid-3TMS ( $\times 10^{-3}$ )         | Plasma        | 0 (0–9.49)          | 4.88 (0–8.35)    | 0 (0–10.47)           | 0.692            |
| 2-Aminobutyric acid-2TMS ( $\times 10^{-2}$ )        | Plasma        | 4.22 (3.29–5.73)    | 4.02 (3.77–5.79) | 4.34 (3.23–5.92)      | 0.890            |
| 2-Aminoethanol-3TMS ( $\times 10^{-1}$ )             | Plasma        | 3.50 (3.00–4.04)    | 3.59 (2.96–4.29) | 3.48 (3.00–4.05)      | 0.818            |
| 2-Aminoisobutyric acid-2TMS ( $\times 10^{-2}$ )     | Plasma        | 6.63 (5.56–7.38)    | 6.83 (5.26–8.02) | 6.51 (5.57–7.40)      | 0.934            |
| 2-Aminopimelic acid-3TMS ( $\times 10^{-1}$ )        | Plasma        | 2.49 (2.13–2.80)    | 2.14 (1.97–2.48) | 2.52 (2.34–2.82)      | 0.089            |
| 2-Deoxy-glucose-4TMS ( $\times 10^{-1}$ )            | Plasma        | 1.11 (0.86–1.37)    | 1.01 (0.83–1.27) | 1.13 (0.87–1.41)      | 0.382            |
| 2-Hydroxybutyric acid-2TMS ( $\times 10^{-1}$ )      | Plasma        | 1.72 (1.35–2.30)    | 1.39 (1.09–2.02) | 1.88 (1.48–2.31)      | 0.101            |
| 2-Hydroxyglutaric acid-3TMS ( $\times 10^{-2}$ )     | Plasma        | 1.32 (0.97–1.38)    | 1.14 (1.07–1.60) | 1.42 (0.94–1.76)      | 0.988            |
| 2-Hydroxyisobutyric acid-2TMS ( $\times 10^{-2}$ )   | Plasma        | 1.09 (0.79–1.38)    | 0.93 (0.80–1.21) | 1.14 (0.77–1.45)      | 0.399            |
| 2-Hydroxyisovaleric acid-2TMS ( $\times 10^{-2}$ )   | Plasma        | 3.78 (2.93–6.23)    | 3.55 (3.25–4.31) | 4.17 (2.73–6.56)      | 0.613            |
| 2-Ketobutyric acid-meto-TMS ( $\times 10^{-2}$ )     | Plasma        | 2.47 (1.94–2.98)    | 2.14 (1.73–2.64) | 2.54 (2.12–3.01)      | 0.137            |
| 2-Ketoglutaric acid-meto-2TMS ( $\times 10^{-2}$ )   | Plasma        | 7.04 (5.53–8.62)    | 5.18 (4.61–5.85) | 7.33 (6.45–9.01)      | <b>&lt;0.001</b> |
| 2-Ketoisocaproic acid-meto-TMS ( $\times 10^{-1}$ )  | Plasma        | 1.38 (1.11–1.64)    | 1.22 (1.17–1.60) | 1.39 (1.08–1.70)      | 0.748            |
| 2-Keto-isovaleric acid-meto-TMS ( $\times 10^{-2}$ ) | Plasma        | 2.13 (1.66–2.55)    | 2.08 (1.86–2.43) | 2.18 (1.62–2.72)      | 0.771            |
| 3-Aminoglutaric acid-2TMS ( $\times 10^{-2}$ )       | Plasma        | 1.72 (0–8.58)       | 6.97 (0.34–9.39) | 1.35 (0–7.94)         | 0.260            |
| 3-Aminoisobutyric acid-3TMS ( $\times 10^{-3}$ )     | Plasma        | 0 (0–7.77)          | 0 (0–0)          | 0 (0–8.86)            | 0.082            |
| 3-Aminopropanoic acid-3TMS ( $\times 10^{-2}$ )      | Plasma        | 3.59 (1.19–7.08)    | 3.96 (2.28–5.78) | 3.22 (0.57–7.84)      | 0.866            |
| 3-Hydroxybutyric acid-2TMS ( $\times 10^{-1}$ )      | Plasma        | 4.04 (3.26–6.16)    | 4.04 (2.67–5.06) | 4.04 (3.37–6.75)      | 0.319            |
| 3-Hydroxyglutaric acid-3TMS ( $\times 10^{-1}$ )     | Plasma        | 8.01 (7.78–8.18)    | 8.03 (7.85–8.20) | 7.97 (7.70–8.19)      | 0.613            |
| 3-Hydroxyisobutyric acid-2TMS ( $\times 10^{-1}$ )   | Plasma        | 1.90 (1.40–2.36)    | 1.84 (1.25–2.25) | 1.93 (1.52–2.55)      | 0.263            |
| 3-Hydroxyisovaleric acid-2TMS ( $\times 10^{-2}$ )   | Plasma        | 4.75 (3.86–5.35)    | 4.79 (3.42–5.29) | 4.71 (4.02–5.36)      | 0.382            |

|                                                          |        |                   |                   |                   |              |
|----------------------------------------------------------|--------|-------------------|-------------------|-------------------|--------------|
| 3-Hydroxypropionic acid-2TMS ( $\times 10^{-2}$ )        | Plasma | 7.08 (6.32–8.13)  | 6.45 (5.63–8.04)  | 7.38 (6.42–8.13)  | 0.334        |
| 3-Methyl-2-oxovaleric acid-meto-TMS ( $\times 10^{-1}$ ) | Plasma | 1.24 (1.02–1.64)  | 1.22 (0.96–1.40)  | 1.30 (1.01–1.65)  | 0.434        |
| 3-Phenyllactic acid-2TMS ( $\times 10^{-3}$ )            | Plasma | 2.62 (0–8.78)     | 0 (0–7.59)        | 5.36 (0–10.02)    | 0.219        |
| 4-Aminobutyric acid-3TMS                                 | Plasma | 0 (0–0)           | 0 (0–0)           | 0 (0–0)           | 0.935        |
| 4-Hydroxyphenyllactic acid-3TMS ( $\times 10^{-2}$ )     | Plasma | 6.51 (4.68–8.55)  | 5.09 (4.14–7.47)  | 6.66 (4.91–8.84)  | 0.163        |
| 4-Hydroxyphenylpyruvic acid-meto-2TMS                    | Plasma | 0 (0–0)           | 0 (0–0)           | 0 (0–0)           | 0.455        |
| 4-Hydroxyproline-3TMS ( $\times 10^{-1}$ )               | Plasma | 1.61 (0.11–3.74)  | 3.15 (0.20–4.00)  | 0.80 (0.71–3.63)  | 0.365        |
| 5-Hydroxymethyl-2-furoic acid-2TMS                       | Plasma | 0 (0–0)           | 0 (0–0)           | 0 (0–0)           | 0.602        |
| 5-Methoxytryptamine-2TMS ( $\times 10^{-2}$ )            | Plasma | 1.52 (0.91–1.88)  | 1.65 (0.34–2.91)  | 1.44 (0.95–1.80)  | 0.724        |
| 5-Oxoproline-2TMS                                        | Plasma | 7.17 (5.85–7.84)  | 7.77 (6.71–8.75)  | 6.86 (5.72–7.71)  | 0.064        |
| Acetoacetic acid-meto-TMS                                | Plasma | 0 (0–0)           | 0 (0–0)           | 0 (0–0)           | 0.354        |
| Acetylglycine-TMS                                        | Plasma | 0 (0–0)           | 0 (0–0)           | 0 (0–0)           | 0.279        |
| Aconitic acid-3TMS ( $\times 10^{-3}$ )                  | Plasma | 0 (0–1.70)        | 0 (0–0)           | 0 (0–7.46)        | 0.065        |
| Adipic acid-2TMS ( $\times 10^{-3}$ )                    | Plasma | 8.34 (4.69–11.11) | 9.25 (2.48–12.48) | 8.21 (4.66–11.11) | 0.988        |
| Alanine-2TMS                                             | Plasma | 24.1 (20.1–27.9)  | 24.4 (21.1–27.5)  | 23.8 (20.1–28.2)  | 0.635        |
| Allose-meto-5TMS ( $\times 10^{-2}$ )                    | Plasma | 9.00 (6.37–11.04) | 7.50 (5.78–9.90)  | 9.12 (6.42–11.49) | 0.238        |
| Arabitol-5TMS ( $\times 10^{-2}$ )                       | Plasma | 0.26 (0–1.15)     | 0 (0–0.88)        | 0.53 (0–1.26)     | 0.302        |
| Arachidonic acid-TMS ( $\times 10^{-1}$ )                | Plasma | 0.72 (0.52–0.86)  | 0.85 (0.73–1.02)  | 0.67 (0.43–0.83)  | <b>0.015</b> |
| Arginine-3TMS ( $\times 10^{-2}$ )                       | Plasma | 1.95 (0.65–3.08)  | 2.19 (1.12–3.00)  | 1.83 (0.30–3.21)  | 0.634        |
| Asparagine-3TMS ( $\times 10^{-2}$ )                     | Plasma | 1.43 (0–6.17)     | 6.38 (0–7.56)     | 1.31 (0–5.61)     | 0.380        |
| Aspartic acid-3TMS ( $\times 10^{-2}$ )                  | Plasma | 1.31 (0–8.06)     | 6.46 (0–8.76)     | 1.08 (0–7.48)     | 0.322        |
| Azelaic acid-2TMS                                        | Plasma | 0 (0–0)           | 0 (0–0)           | 0 (0–0)           | 0.787        |
| Benzoic acid-TMS ( $\times 10^{-1}$ )                    | Plasma | 5.62 (4.84–6.62)  | 5.40 (4.68–6.27)  | 5.77 (4.91–7.08)  | 0.453        |
| Caproic acid-TMS ( $\times 10^{-1}$ )                    | Plasma | 1.18 (1.03–1.39)  | 1.30 (1.07–1.41)  | 1.17 (0.95–1.41)  | 0.350        |
| Cholesterol-TMS ( $\times 10^{-2}$ )                     | Plasma | 0.99 (0.71–1.28)  | 1.30 (0.79–1.51)  | 0.96 (0.68–1.12)  | 0.153        |
| Citramalic acid-3TMS ( $\times 10^{-2}$ )                | Plasma | 0.73 (0–1.06)     | 0.94 (0–1.21)     | 0.71 (0–1.00)     | 0.461        |
| Citric acid-4TMS ( $\times 10^{-1}$ )                    | Plasma | 3.61 (3.10–4.07)  | 3.16 (2.94–3.79)  | 3.77 (3.35–4.15)  | 0.305        |
| Citrulline-3TMS                                          | Plasma | 0 (0–0)           | 0 (0–0)           | 0 (0–0)           | 0.602        |
| Creatinine-3TMS ( $\times 10^{-3}$ )                     | Plasma | 0 (0–5.41)        | 0 (0–6.63)        | 0 (0–5.16)        | 0.926        |

|                                                  |        |                  |                   |                  |              |
|--------------------------------------------------|--------|------------------|-------------------|------------------|--------------|
| Cystamine-nTMS                                   | Plasma | 0 (0–0)          | 0 (0–0)           | 0 (0–0)          | 0.602        |
| Cysteine-3TMS ( $\times 10^{-2}$ )               | Plasma | 2.21 (0–8.53)    | 7.64 (0.31–11.68) | 1.93 (0–7.40)    | 0.115        |
| Cystine-4TMS ( $\times 10^{-2}$ )                | Plasma | 3.12 (2.46–4.51) | 2.58 (1.62–3.01)  | 3.22 (2.59–5.06) | 0.055        |
| Decanoic acid-TMS ( $\times 10^{-2}$ )           | Plasma | 6.69 (5.63–7.34) | 6.66 (6.02–7.09)  | 6.74 (5.25–7.46) | 0.915        |
| Docosahexaenoic acid-TMS ( $\times 10^{-2}$ )    | Plasma | 1.20 (0–1.78)    | 0.55 (0–1.45)     | 1.25 (0.38–1.93) | 0.117        |
| Eicosapentaenoic acid-TMS ( $\times 10^{-2}$ )   | Plasma | 7.33 (5.33–8.83) | 9.31 (7.38–9.53)  | 7.18 (4.92–8.55) | <b>0.013</b> |
| Elaidic acid-TMS ( $\times 10^{-2}$ )            | Plasma | 5.92 (4.74–7.34) | 4.99 (3.78–6.12)  | 6.61 (5.02–7.98) | <b>0.033</b> |
| Fructose-meto-5TMS ( $\times 10^{-2}$ )          | Plasma | 2.04 (1.32–4.26) | 2.36 (1.81–5.55)  | 1.97 (1.22–2.57) | 0.125        |
| Fumaric acid-2TMS ( $\times 10^{-2}$ )           | Plasma | 1.98 (1.74–2.40) | 1.82 (1.50–2.27)  | 2.02 (1.83–2.47) | 0.129        |
| Galacturonic acid-meto-5TMS ( $\times 10^{-2}$ ) | Plasma | 0 (0–1.00)       | 0 (0–0.74)        | 0 (0–1.25)       | 0.386        |
| Glucaric acid-6TMS ( $\times 10^{-2}$ )          | Plasma | 1.02 (0.69–1.34) | 0.91 (0.32–1.13)  | 1.04 (0.81–1.44) | 0.136        |
| Gluconic acid-6TMS ( $\times 10^{-2}$ )          | Plasma | 3.42 (2.77–4.26) | 3.58 (2.80–4.27)  | 3.42 (2.73–4.29) | 0.939        |
| Glucosamine-5TMS ( $\times 10^{-2}$ )            | Plasma | 1.86 (1.31–2.30) | 1.85 (1.60–2.23)  | 1.90 (1.10–2.31) | 0.701        |
| Glucose-meto-5TMS                                | Plasma | 7.02 (5.98–8.67) | 5.88 (4.93–6.75)  | 7.43 (6.35–9.07) | <b>0.006</b> |
| Glucuronic acid-meto-5TMS ( $\times 10^{-2}$ )   | Plasma | 1.90 (1.39–2.71) | 1.73 (1.10–2.16)  | 2.01 (1.59–2.99) | 0.203        |
| Glutamic acid-3TMS ( $\times 10^{-1}$ )          | Plasma | 2.80 (2.37–5.87) | 4.59 (0.58–7.09)  | 1.70 (0.22–4.90) | 0.101        |
| Glutamine-3TMS ( $\times 10^{-1}$ )              | Plasma | 4.82 (1.28–8.37) | 7.33 (1.71–9.59)  | 4.74 (1.23–8.36) | 0.305        |
| Glutaric acid-2TMS ( $\times 10^{-2}$ )          | Plasma | 1.62 (1.16–2.02) | 1.65 (1.35–1.76)  | 1.56 (1.16–2.06) | 0.818        |
| Glyceric acid-3TMS ( $\times 10^{-1}$ )          | Plasma | 1.27 (1.10–1.56) | 1.28 (1.21–1.68)  | 1.27 (1.10–1.56) | 0.530        |
| Glycerol 3-phosphate-4TMS ( $\times 10^{-2}$ )   | Plasma | 0 (0–1.25)       | 0 (0–0.94)        | 0.95 (0–1.29)    | 0.109        |
| Glycerol-3TMS ( $\times 10^{-1}$ )               | Plasma | 1.00 (0.80–1.25) | 1.06 (0.79–1.23)  | 0.99 (0.80–1.34) | 0.988        |
| Glycine-3TMS                                     | Plasma | 4.87 (3.25–5.88) | 5.92 (4.09–7.49)  | 4.81 (3.07–5.66) | 0.101        |
| Glycolic acid-2TMS ( $\times 10^{-1}$ )          | Plasma | 2.15 (1.93–2.39) | 2.19 (1.91–2.45)  | 2.12 (1.92–2.37) | 0.771        |
| Glyoxylic acid-meto-TMS ( $\times 10^{-1}$ )     | Plasma | 4.95 (4.64–5.40) | 5.06 (4.73–5.31)  | 4.93 (4.47–5.66) | 0.963        |
| Histidine-3TMS ( $\times 10^{-1}$ )              | Plasma | 1.50 (0.54–2.76) | 1.64 (0.93–2.91)  | 1.24 (0.43–2.91) | 0.350        |
| Homocysteine-3TMS                                | Plasma | 0 (0–0)          | 0 (0–0)           | 0 (0–0)          | 0.602        |
| Hydroxylamine-3TMS ( $\times 10^{-1}$ )          | Plasma | 6.39 (5.50–8.19) | 6.24 (4.48–6.86)  | 7.32 (5.60–8.45) | 0.154        |
| Hypotaurine-3TMS ( $\times 10^{-2}$ )            | Plasma | 0.82 (0–1.55)    | 0.84 (0–1.11)     | 0.81 (0–1.61)    | 0.646        |
| Hypoxanthine-2TMS ( $\times 10^{-2}$ )           | Plasma | 0 (0–0.81)       | 0 (0–1.18)        | 0 (0–0.79)       | 0.488        |

|                                               |        |                  |                  |                   |              |
|-----------------------------------------------|--------|------------------|------------------|-------------------|--------------|
| Indol-3-acetic acid-2TMS ( $\times 10^{-2}$ ) | Plasma | 3.32 (2.11–3.90) | 3.89 (3.10–5.10) | 3.15 (2.00–3.61)  | 0.078        |
| Inositol-6TMS ( $\times 10^{-1}$ )            | Plasma | 1.43 (1.11–1.83) | 1.31 (0.99–1.75) | 1.49 (1.11–1.92)  | 0.453        |
| Isocitric acid-4TMS ( $\times 10^{-2}$ )      | Plasma | 2.18 (1.96–2.73) | 1.89 (1.62–2.13) | 2.34 (2.07–2.86)  | <b>0.015</b> |
| Isoleucine-2TMS                               | Plasma | 2.89 (1.61–3.63) | 3.39 (2.38–3.53) | 2.87 (1.43–3.73)  | 0.366        |
| Kynurenine-3TMS ( $\times 10^{-3}$ )          | Plasma | 0 (0–5.11)       | 0 (0–5.36)       | 0 (0–4.60)        | 0.985        |
| Lactic acid-2TMS                              | Plasma | 7.42 (6.38–9.41) | 6.28 (5.63–7.71) | 7.86 (6.77–10.00) | <b>0.018</b> |
| Lactose-meto-8TMS                             | Plasma | 0 (0–0)          | 0 (0–0)          | 0 (0–0)           | 0.602        |
| Lauric acid-TMS ( $\times 10^{-1}$ )          | Plasma | 0.88 (0.71–1.03) | 0.99 (0.89–1.03) | 0.83 (0.67–1.06)  | 0.137        |
| Leucine-2TMS                                  | Plasma | 5.56 (3.07–6.85) | 6.85 (4.59–7.24) | 5.39 (2.72–6.28)  | 0.083        |
| Linoleic acid-TMS ( $\times 10^{-1}$ )        | Plasma | 1.51 (1.19–1.86) | 1.44 (1.11–1.68) | 1.53 (1.24–1.92)  | 0.471        |
| Lysine-4TMS                                   | Plasma | 0.57 (0.36–0.86) | 0.59 (0.51–0.97) | 0.55 (0.35–0.81)  | 0.319        |
| Lyxose-meto-4TMS                              | Plasma | 0 (0–0)          | 0 (0–0)          | 0 (0–0)           | 0.602        |
| Maleic acid-2TMS                              | Plasma | 0 (0–0)          | 0 (0–0)          | 0 (0–0)           | 0.860        |
| Malic acid-3TMS ( $\times 10^{-3}$ )          | Plasma | 5.02 (0–6.70)    | 4.62 (0–5.33)    | 5.51 (0–7.05)     | 0.349        |
| Mannitol-6TMS                                 | Plasma | 1.04 (0.87–1.26) | 0.94 (0.78–1.03) | 1.10 (0.91–1.35)  | <b>0.033</b> |
| Mannose-meto-5TMS ( $\times 10^{-1}$ )        | Plasma | 1.23 (0.92–1.43) | 0.93 (0.85–1.37) | 1.24 (1.03–1.60)  | 0.095        |
| Margaric acid-TMS ( $\times 10^{-2}$ )        | Plasma | 4.10 (3.62–4.88) | 4.39 (3.78–5.08) | 4.01 (3.51–4.85)  | 0.434        |
| meso-Erythritol-4TMS ( $\times 10^{-3}$ )     | Plasma | 0 (0–0)          | 0 (0–0)          | 0 (0–0)           | 0.174        |
| Methionine-2TMS ( $\times 10^{-2}$ )          | Plasma | 0 (0–2.66)       | 2.39 (0–3.73)    | 0 (0–2.53)        | 0.343        |
| Myristic acid-TMS ( $\times 10^{-1}$ )        | Plasma | 1.53 (1.26–1.82) | 1.70 (1.44–1.85) | 1.50 (1.16–1.80)  | 0.193        |
| N6-Acetyllysine-2TMS                          | Plasma | 0 (0–0)          | 0 (0–0)          | 0 (0–0)           | 0.602        |
| N-Acetylglutamine-3TMS                        | Plasma | 0 (0–0)          | 0 (0–0)          | 0 (0–0)           | 0.279        |
| Niacinamide-TMS                               | Plasma | 0 (0–0)          | 0 (0–0)          | 0 (0–0)           | 0.602        |
| Nicotinic acid-TMS                            | Plasma | 0 (0–0)          | 0 (0–0)          | 0 (0–0)           | 0.833        |
| Nonanoic acid-TMS ( $\times 10^{-1}$ )        | Plasma | 3.63 (2.98–6.88) | 6.84 (6.27–7.29) | 3.31 (2.67–5.93)  | <b>0.004</b> |
| Octadecanol-TMS ( $\times 10^{-2}$ )          | Plasma | 8.08 (7.18–9.13) | 7.53 (7.22–8.30) | 8.15 (6.98–9.25)  | 0.193        |
| Octanoic acid-TMS ( $\times 10^{-2}$ )        | Plasma | 6.20 (5.09–6.65) | 6.29 (5.78–6.65) | 5.83 (4.70–6.65)  | 0.305        |
| Oleamide-TMS ( $\times 10^{-1}$ )             | Plasma | 2.58 (2.10–3.82) | 2.74 (2.08–3.88) | 2.58 (2.14–3.85)  | 0.818        |
| Oleic acid-TMS ( $\times 10^{-1}$ )           | Plasma | 4.75 (3.55–5.52) | 4.17 (3.06–5.09) | 4.76 (3.60–5.75)  | 0.250        |

|                                                 |        |                  |                  |                  |              |
|-------------------------------------------------|--------|------------------|------------------|------------------|--------------|
| O-Phosphoethanolamine-3TMS ( $\times 10^{-3}$ ) | Plasma | 0 (0–0)          | 0 (0–0)          | 0 (0–0)          | 0.821        |
| Ornithine-4TMS                                  | Plasma | 1.37 (0.57–1.85) | 1.61 (0.75–1.85) | 1.33 (0.54–1.90) | 0.510        |
| Oxalic acid-2TMS                                | Plasma | 3.60 (3.09–4.09) | 3.94 (3.60–4.11) | 3.48 (2.97–4.09) | 0.214        |
| Palmitic acid-TMS                               | Plasma | 4.77 (3.97–5.61) | 5.32 (4.38–5.64) | 4.59 (3.96–5.62) | 0.471        |
| Palmitoleic acid-TMS ( $\times 10^{-2}$ )       | Plasma | 4.24 (2.49–5.64) | 2.55 (2.05–4.64) | 4.59 (2.96–5.80) | 0.089        |
| ParaXanthine-TMS                                | Plasma | 0 (0–0)          | 0 (0–0)          | 0 (0–0)          | 0.480        |
| Phenylacetic acid-TMS                           | Plasma | 0 (0–0)          | 0 (0–0)          | 0 (0–0)          | 0.279        |
| Phenylalanine-2TMS                              | Plasma | 0.47 (0.07–2.31) | 1.75 (0.09–2.57) | 0.40 (0.68–2.30) | 0.350        |
| Phosphoric acid-3TMS                            | Plasma | 20.8 (19.0–24.3) | 23.9 (20.6–27.6) | 20.2 (18.2–22.5) | <b>0.024</b> |
| Proline-2TMS                                    | Plasma | 2.13 (1.25–4.06) | 2.64 (1.92–4.42) | 1.83 (1.22–3.98) | 0.203        |
| Psicose-meto-5TMS ( $\times 10^{-2}$ )          | Plasma | 1.90 (1.27–4.20) | 3.16 (1.79–5.00) | 1.84 (0.93–3.37) | 0.078        |
| Putrescine-4TMS ( $\times 10^{-2}$ )            | Plasma | 0 (0–1.67)       | 0 (0–1.71)       | 0 (0–1.67)       | 0.854        |
| Pyrogallol-3TMS ( $\times 10^{-3}$ )            | Plasma | 0 (0–0)          | 0 (0–5.30)       | 0 (0–0)          | <b>0.006</b> |
| Pyruvic acid-meto-TMS                           | Plasma | 0.67 (0.57–0.81) | 0.60 (0.54–0.67) | 0.70 (0.60–0.91) | <b>0.048</b> |
| Ribitol-5TMS ( $\times 10^{-3}$ )               | Plasma | 4.33 (0–9.52)    | 0 (0–6.82)       | 5.90 (0–9.61)    | 0.163        |
| Ribonic acid-5TMS ( $\times 10^{-2}$ )          | Plasma | 1.93 (0–2.69)    | 0 (0–2.04)       | 2.22 (0–2.83)    | 0.170        |
| Serine-3TMS                                     | Plasma | 0.48 (0.19–1.02) | 0.98 (0.46–1.12) | 4.24 (1.81–8.68) | 0.083        |
| Sorbitol-6TMS ( $\times 10^{-1}$ )              | Plasma | 1.31 (0.94–1.97) | 1.95 (0.81–2.40) | 1.26 (0.95–1.90) | 0.305        |
| Sorbose-meto-5TMS ( $\times 10^{-2}$ )          | Plasma | 1.14 (0–2.18)    | 2.14 (0.61–4.31) | 0.98 (0–1.89)    | <b>0.043</b> |
| Stearic acid-TMS                                | Plasma | 3.36 (2.93–3.86) | 3.70 (3.34–4.06) | 3.29 (2.88–3.71) | 0.137        |
| Succinic acid-2TMS ( $\times 10^{-1}$ )         | Plasma | 0.87 (0.80–0.96) | 0.86 (0.83–0.97) | 0.88 (0.78–0.96) | 0.725        |
| Sucrose-8TMS ( $\times 10^{-2}$ )               | Plasma | 0 (0–1.24)       | 1.69 (0–6.92)    | 0 (0–0.79)       | <b>0.029</b> |
| Tagatose-meto-5TMS ( $\times 10^{-2}$ )         | Plasma | 1.14 (0–2.99)    | 2.12 (0–5.66)    | 0.83 (0–1.57)    | 0.165        |
| Tartaric acid-4TMS ( $\times 10^{-3}$ )         | Plasma | 0 (0–0)          | 0 (0–0)          | 0 (0–0)          | 0.174        |
| Taurine-3TMS ( $\times 10^{-2}$ )               | Plasma | 1.33 (0.32–2.13) | 1.16 (0.50–2.54) | 1.37 (0.21–2.19) | 0.841        |
| Threitol-4TMS                                   | Plasma | 0 (0–0)          | 0 (0–0)          | 0 (0–0)          | 0.455        |
| Threonic acid-4TMS ( $\times 10^{-2}$ )         | Plasma | 3.93 (2.68–4.44) | 3.63 (2.60–4.46) | 3.97 (2.57–4.53) | 0.939        |
| Threonine-3TMS ( $\times 10^{-1}$ )             | Plasma | 3.80 (1.50–6.70) | 6.18 (3.43–6.73) | 3.06 (1.37–6.36) | 0.182        |
| Triethanolamine-3TMS ( $\times 10^{-2}$ )       | Plasma | 1.59 (1.16–2.13) | 1.58 (1.10–2.90) | 1.60 (1.16–2.10) | 0.771        |

|                                                          |                |                    |                    |                    |                  |
|----------------------------------------------------------|----------------|--------------------|--------------------|--------------------|------------------|
| Tryptophan-3TMS                                          | Plasma         | 1.22 (0.93–1.74)   | 1.58 (1.19–2.20)   | 1.11 (0.85–1.70)   | 0.055            |
| Tyramine-3TMS                                            | Plasma         | 1.20 (0.71–1.67)   | 1.27 (0.97–1.91)   | 1.15 (0.68–1.63)   | 0.366            |
| Tyrosine-3TMS                                            | Plasma         | 3.35 (2.33–4.74)   | 3.44 (2.98–4.46)   | 3.10 (2.16–4.89)   | 0.490            |
| Urea-2TMS                                                | Plasma         | 9.39 (7.79–12.19)  | 10.81 (8.43–11.52) | 8.95 (7.67–12.44)  | 0.453            |
| Uric acid-4TMS                                           | Plasma         | 1.59 (1.46–1.92)   | 1.46 (1.39–1.78)   | 1.60 (1.51–1.95)   | 0.173            |
| Valine-2TMS                                              | Plasma         | 13.7 (11.0–16.2)   | 15.5 (13.6–16.6)   | 12.6 (10.3–16.3)   | 0.154            |
| Xanthine-3TMS                                            | Plasma         | 0 (0–0)            | 0 (0–0)            | 0 (0–0)            | 0.602            |
| Xylitol-5TMS                                             | Plasma         | 0 (0–0)            | 0 (0–0)            | 0 (0–0)            | 0.602            |
| Xylose-meto-4TMS                                         | Plasma         | 0 (0–0)            | 0 (0–0)            | 0 (0–0)            | 0.455            |
| <b>2-Isopropylmalic acid-3TMS</b>                        | <b>Urinary</b> | <b>1</b>           | <b>1</b>           | <b>1</b>           | <b>Reference</b> |
| 1,6-Anhydroglucose-3TMS ( $\times 10^{-1}$ )             | Urinary        | 2.73 (1.19–3.61)   | 2.17 (0.59–5.83)   | 2.75 (1.33–3.56)   | 0.890            |
| 1-Hexadecanol-TMS ( $\times 10^{-1}$ )                   | Urinary        | 1.80 (1.46–2.13)   | 1.93 (1.56–2.27)   | 1.77 (1.41–2.04)   | 0.305            |
| 2-Aminobutyric acid-2TMS ( $\times 10^{-2}$ )            | Urinary        | 1.17 (0.66–1.70)   | 1.28 (1.13–1.59)   | 1.05 (0.61–1.82)   | 0.350            |
| 2-Aminoethanol-3TMS                                      | Urinary        | 11.01 (7.71–18.13) | 14.79 (8.73–20.02) | 10.84 (6.84–17.62) | 0.490            |
| 2-Aminopimelic acid-3TMS                                 | Urinary        | 8.69 (6.25–13.99)  | 10.16 (5.04–15.38) | 8.44 (6.12–13.23)  | 0.748            |
| 2-Hydroxybutyric acid-2TMS                               | Urinary        | 0 (0–0)            | 0 (0–0)            | 0 (0–0)            | 0.354            |
| 2-Hydroxyglutaric acid-3TMS ( $\times 10^{-1}$ )         | Urinary        | 4.98 (3.22–8.02)   | 5.90 (1.94–8.78)   | 4.46 (3.31–7.56)   | 0.794            |
| 2-Hydroxyhippuric acid-2TMS ( $\times 10^{-2}$ )         | Urinary        | 3.42 (1.43–6.91)   | 4.72 (1.98–11.03)  | 2.79 (1.42–6.32)   | 0.391            |
| 2-Hydroxyisobutyric acid-2TMS ( $\times 10^{-1}$ )       | Urinary        | 1.25 (0.89–1.76)   | 1.28 (0.67–2.07)   | 1.22 (0.90–1.71)   | 0.890            |
| 2-Hydroxyisovaleric acid-2TMS                            | Urinary        | 0 (0–0)            | 0 (0–0)            | 0 (0–0)            | 0.220            |
| 2-Ketoadipic acid-oxime-3TMS                             | Urinary        | 0 (0–0)            | 0 (0–0)            | 0 (0–0)            | 0.455            |
| 2-Ketobutyric acid-meto-TMS ( $\times 10^{-2}$ )         | Urinary        | 1.60 (1.24–1.89)   | 1.38 (1.13–1.79)   | 1.62 (1.23–1.92)   | 0.173            |
| 2-Ketoglutaric acid-meto-2TMS                            | Urinary        | 0.93 (0.54–1.29)   | 1.17 (0.29–1.54)   | 0.90 (0.56–1.20)   | 0.988            |
| 2-Ketoisocaproic acid-meto-TMS ( $\times 10^{-3}$ )      | Urinary        | 0 (0–9.71)         | 6.61 (0–9.61)      | 0 (0–10.21)        | 0.750            |
| 2-Keto-isovaleric acid-meto-TMS                          | Urinary        | 0 (0–0)            | 0 (0–0)            | 0 (0–0)            | 0.354            |
| 2-Methyl-3-hydroxybutyric acid-2TMS ( $\times 10^{-3}$ ) | Urinary        | 0 (0–1.61)         | 0 (0–0)            | 0 (0–6.55)         | 0.356            |
| 2-Phosphoglyceric acid -4TMS ( $\times 10^{-3}$ )        | Urinary        | 0 (0–0)            | 0 (0–6.60)         | 0 (0–0)            | 0.125            |
| 3-Aminoglutaric acid-2TMS ( $\times 10^{-2}$ )           | Urinary        | 4.97 (3.03–8.78)   | 7.64 (5.35–10.38)  | 4.31 (2.84–8.18)   | 0.095            |
| 3-Aminoisobutyric acid-3TMS ( $\times 10^{-1}$ )         | Urinary        | 2.31 (0.60–11.10)  | 1.31 (0.79–15.74)  | 2.84 (0.55–1.16)   | 0.988            |
| 3-Aminopropanoic acid-3TMS ( $\times 10^{-1}$ )          | Urinary        | 0.82 (0.40–2.39)   | 0.80 (0.32–1.18)   | 0.82 (0.41–2.94)   | 0.434            |

|                                                           |         |                   |                    |                   |       |
|-----------------------------------------------------------|---------|-------------------|--------------------|-------------------|-------|
| 3-Hydroxy-3-methylglutaric acid-3TMS ( $\times 10^{-2}$ ) | Urinary | 5.34 (3.98–7.42)  | 6.68 (2.04–7.69)   | 5.24 (4.14–7.33)  | 0.842 |
| 3-Hydroxyanthranilic acid-3TMS ( $\times 10^{-3}$ )       | Urinary | 0 (0–8.61)        | 0 (0–2.72)         | 0 (0–1.01)        | 0.443 |
| 3-Hydroxybutyric acid-2TMS ( $\times 10^{-1}$ )           | Urinary | 1.96 (1.61–2.35)  | 1.75 (1.35–2.15)   | 2.01 (1.62–2.40)  | 0.089 |
| 3-Hydroxyglutaric acid-3TMS ( $\times 10^{-1}$ )          | Urinary | 7.93 (7.58–8.26)  | 8.12 (7.93–8.23)   | 7.83 (7.52–8.30)  | 0.214 |
| 3-Hydroxyisobutyric acid-2TMS ( $\times 10^{-1}$ )        | Urinary | 1.65 (1.20–2.13)  | 1.79 (1.01–2.05)   | 1.63 (1.25–2.21)  | 0.725 |
| 3-Hydroxyisovaleric acid-2TMS ( $\times 10^{-1}$ )        | Urinary | 4.10 (3.10–6.28)  | 4.64 (2.80–5.33)   | 4.02 (3.08–7.20)  | 0.657 |
| 3-Hydroxyphenylacetic acid-2TMS ( $\times 10^{-2}$ )      | Urinary | 0 (0–0.91)        | 0 (0–1.15)         | 0 (0–0.93)        | 0.623 |
| 3-Hydroxypropionic acid-2TMS ( $\times 10^{-1}$ )         | Urinary | 1.22 (0.83–2.02)  | 1.31 (0.77–2.25)   | 1.18 (0.87–1.74)  | 0.842 |
| 3-Methoxy-4-hydroxybenzoic acid-2TMS ( $\times 10^{-2}$ ) | Urinary | 1.06 (0–1.80)     | 0.77 (0–1.08)      | 1.29 (0–1.95)     | 0.094 |
| 3-Methyl-2-oxovaleric acid-meto-TMS ( $\times 10^{-2}$ )  | Urinary | 1.49 (0.64–1.95)  | 0.88 (0.64–1.70)   | 1.51 (0.72–2.08)  | 0.499 |
| 3-Methyladipic acid-2TMS ( $\times 10^{-2}$ )             | Urinary | 2.68 (0–5.85)     | 0 (0–3.04)         | 2.84 (0–6.42)     | 0.175 |
| 3-Methylglutaric acid-2TMS ( $\times 10^{-2}$ )           | Urinary | 1.52 (1.01–2.51)  | 1.48 (1.15–2.23)   | 1.55 (0.47–2.89)  | 0.939 |
| 3-Phenyllactic acid-2TMS ( $\times 10^{-2}$ )             | Urinary | 0.24 (0–1.40)     | 0 (0–0.56)         | 0.62 (0–1.58)     | 0.185 |
| 3-Phosphoglyceric acid-4TMS ( $\times 10^{-3}$ )          | Urinary | 0 (0–9.87)        | 7.35 (0–18.50)     | 0 (0–8.69)        | 0.312 |
| 3-Sulfinioalanine-3TMS ( $\times 10^{-3}$ )               | Urinary | 0 (0–3.87)        | 0 (0–4.51)         | 0 (0–1.89)        | 0.318 |
| 4-Aminobutyric acid-3TMS ( $\times 10^{-2}$ )             | Urinary | 4.24 (0–7.43)     | 7.35 (3.82–9.97)   | 3.63 (0–6.28)     | 0.051 |
| 4-Hydroxybenzoic acid-2TMS ( $\times 10^{-2}$ )           | Urinary | 3.10 (1.87–3.89)  | 2.70 (1.72–3.99)   | 3.10 (1.99–3.95)  | 0.890 |
| 4-Hydroxyphenylacetic acid-2TMS ( $\times 10^{-1}$ )      | Urinary | 0.85 (0.35–1.49)  | 0.93 (0.29–1.51)   | 7.94 (3.92–1.51)  | 0.657 |
| 4-Hydroxyphenyllactic acid-3TMS ( $\times 10^{-1}$ )      | Urinary | 1.29 (0.73–2.24)  | 1.32 (0.41–1.78)   | 1.27 (0.80–2.45)  | 0.510 |
| 4-Hydroxyproline-3TMS ( $\times 10^{-2}$ )                | Urinary | 0 (0–5.24)        | 0 (0–9.19)         | 0 (0–5.17)        | 0.986 |
| 5-Aminolevulinic acid-meto-3TMS ( $\times 10^{-2}$ )      | Urinary | 1.33 (0.87–1.82)  | 1.72 (1.14–2.39)   | 1.10 (0.42–1.62)  | 0.106 |
| 5-Aminovaleric acid-3TMS ( $\times 10^{-1}$ )             | Urinary | 0.72 (0.53–1.32)  | 0.76 (0.52–1.33)   | 0.70 (0.52–1.24)  | 0.657 |
| 5-Hydroxymethyl-2-furoic acid-2TMS ( $\times 10^{-1}$ )   | Urinary | 1.50 (0.67–2.24)  | 1.84 (0.42–2.66)   | 1.49 (0.66–2.13)  | 0.842 |
| 5-Oxoproline-2TMS                                         | Urinary | 9.20 (7.40–11.82) | 10.09 (6.18–11.52) | 8.49 (7.48–11.85) | 0.963 |
| 7-Methylguanine-2TMS ( $\times 10^{-1}$ )                 | Urinary | 3.63 (2.25–5.57)  | 4.00 (2.32–8.43)   | 3.23 (2.24–5.37)  | 0.226 |
| Acetoacetic acid-meto-TMS                                 | Urinary | 0 (0–0)           | 0 (0–0)            | 0 (0–0)           | 0.602 |
| Acetylglycine-TMS                                         | Urinary | 0 (0–0)           | 0 (0–0)            | 0 (0–0)           | 0.354 |
| Aconitic acid-3TMS                                        | Urinary | 1.64 (0.98–2.71)  | 2.63 (0.89–2.92)   | 1.59 (0.98–2.47)  | 0.530 |
| Adenine-2TMS ( $\times 10^{-1}$ )                         | Urinary | 1.60 (1.18–2.45)  | 1.72 (1.17–4.07)   | 1.57 (1.13–2.30)  | 0.382 |

|                                                           |         |                    |                    |                    |              |
|-----------------------------------------------------------|---------|--------------------|--------------------|--------------------|--------------|
| Adenosine-4TMS ( $\times 10^{-1}$ )                       | Urinary | 0.91 (0.67–1.51)   | 1.31 (0.78–2.39)   | 0.90 (0.61–1.28)   | 0.108        |
| Adipic acid-2TMS ( $\times 10^{-2}$ )                     | Urinary | 1.70 (1.07–2.85)   | 1.32 (0.78–1.97)   | 2.12 (1.10–3.07)   | 0.163        |
| Alanine-2TMS                                              | Urinary | 10.44 (6.52–14.10) | 12.72 (8.70–13.82) | 10.29 (6.15–14.53) | 0.571        |
| Allantoin-3TMS ( $\times 10^{-2}$ )                       | Urinary | 4.54 (1.74–9.02)   | 4.74 (0.84–1.11)   | 4.35 (1.84–8.63)   | 0.939        |
| Allose-meto-5TMS ( $\times 10^{-2}$ )                     | Urinary | 7.20 (4.96–9.53)   | 7.43 (4.22–24.13)  | 6.72 (4.92–9.24)   | 0.350        |
| Arabinose-meto-4TMS ( $\times 10^{-1}$ )                  | Urinary | 3.40 (2.44–5.35)   | 3.98 (2.15–6.26)   | 3.19 (2.40–5.20)   | 0.434        |
| Arabitol-5TMS ( $\times 10^{-1}$ )                        | Urinary | 6.78 (4.37–9.89)   | 8.37 (4.25–8.74)   | 6.09 (4.37–10.54)  | 0.939        |
| Arachidonic acid-TMS                                      | Urinary | 0 (0–0)            | 0 (0–0)            | 0 (0–0)            | 0.602        |
| Arginine-3TMS ( $\times 10^{-1}$ )                        | Urinary | 1.15 (0.40–1.75)   | 1.51 (1.14–2.33)   | 0.89 (0.33–1.61)   | 0.145        |
| Ascorbic acid-4TMS                                        | Urinary | 0 (0–0)            | 0 (0–0)            | 0 (0–0)            | 0.928        |
| Asparagine-3TMS ( $\times 10^{-1}$ )                      | Urinary | 1.27 (0.69–3.31)   | 1.14 (0–3.21)      | 1.30 (0.83–3.32)   | 0.283        |
| Aspartic acid-3TMS ( $\times 10^{-2}$ )                   | Urinary | 4.35 (2.59–7.91)   | 6.32 (4.82–9.39)   | 3.85 (2.47–7.50)   | 0.122        |
| Azelaic acid-2TMS ( $\times 10^{-2}$ )                    | Urinary | 0.91 (0–2.98)      | 0 (0–0.36)         | 1.33 (0–3.19)      | <b>0.030</b> |
| Benzoic acid-TMS ( $\times 10^{-1}$ )                     | Urinary | 4.43 (3.49–4.93)   | 4.45 (3.68–4.80)   | 4.42 (3.43–5.04)   | 0.657        |
| Caproic acid-TMS ( $\times 10^{-1}$ )                     | Urinary | 1.09 (0.96–1.24)   | 1.13 (0.93–1.33)   | 1.07 (0.96–1.25)   | 0.988        |
| Catechol-2TMS ( $\times 10^{-2}$ )                        | Urinary | 3.13 (1.28–6.16)   | 3.18 (2.16–8.76)   | 2.14 (1.15–5.84)   | 0.444        |
| Cholesterol-TMS                                           | Urinary | 0 (0–0)            | 0 (0–0)            | 0 (0–0)            | 0.602        |
| Citramalic acid-3TMS ( $\times 10^{-1}$ )                 | Urinary | 3.91 (2.82–5.41)   | 3.88 (2.20–9.98)   | 3.95 (2.75–5.23)   | 0.657        |
| Citric acid-4TMS                                          | Urinary | 13.15 (9.33–20.96) | 14.94 (7.67–23.22) | 13.02 (9.29–19.21) | 0.748        |
| Creatinine-3TMS                                           | Urinary | 0.65 (0.41–1.03)   | 1.02 (0.53–2.00)   | 0.60 (0.40–0.91)   | 0.055        |
| Cystathionine-4TMS ( $\times 10^{-2}$ )                   | Urinary | 0.11 (0–1.63)      | 0 (0–0.94)         | 0.67 (0–1.74)      | 0.258        |
| Cysteine-3TMS ( $\times 10^{-1}$ )                        | Urinary | 2.13 (1.18–3.62)   | 2.75 (1.64–4.74)   | 1.94 (1.09–3.36)   | 0.238        |
| Cystine-4TMS ( $\times 10^{-2}$ )                         | Urinary | 3.55 (1.42–5.48)   | 3.64 (3.04–4.43)   | 2.74 (1.16–7.10)   | 0.434        |
| Cytosine-2TMS ( $\times 10^{-1}$ )                        | Urinary | 1.42 (0.95–2.08)   | 1.79 (0.66–2.67)   | 1.40 (0.94–2.04)   | 0.635        |
| Decanoic acid-TMS ( $\times 10^{-2}$ )                    | Urinary | 5.40 (4.59–6.54)   | 5.98 (4.55–7.39)   | 5.33 (4.67–6.51)   | 0.471        |
| Dihydroxyacetone phosphate-meto-3TMS ( $\times 10^{-1}$ ) | Urinary | 1.12 (0.57–1.71)   | 1.52 (0.63–1.94)   | 1.02 (0.57–1.60)   | 0.382        |
| Docosaehaenoic acid-TMS ( $\times 10^{-2}$ )              | Urinary | 0 (0–1.17)         | 0 (0–1.40)         | 0 (0–1.16)         | 0.919        |
| Elaidic acid-TMS ( $\times 10^{-1}$ )                     | Urinary | 0.94 (0.61–1.35)   | 0.94 (0.87–1.20)   | 0.83 (0.59–1.65)   | 0.417        |
| Ethylmalonic acid-2TMS ( $\times 10^{-1}$ )               | Urinary | 0.82 (0.50–1.18)   | 0.96 (0.46–1.11)   | 0.82 (0.53–1.19)   | 0.939        |



|                                                |         |                    |                     |                    |              |
|------------------------------------------------|---------|--------------------|---------------------|--------------------|--------------|
| Fructose-meto-5TMS ( $\times 10^{-2}$ )        | Urinary | 4.08 (1.85–8.31)   | 7.50 (1.47–15.30)   | 3.82 (1.93–7.46)   | 0.263        |
| Fucose-meto-4TMS ( $\times 10^{-2}$ )          | Urinary | 0 (0–1.53)         | 0 (0–1.89)          | 0 (0–1.54)         | 0.696        |
| Fumaric acid-2TMS ( $\times 10^{-2}$ )         | Urinary | 5.95 (4.17–7.69)   | 5.23 (3.05–5.98)    | 6.54 (4.52–7.78)   | 0.122        |
| Galactitol-6TMS ( $\times 10^{-1}$ )           | Urinary | 1.49 (0.79–2.44)   | 1.64 (1.15–4.71)    | 1.40 (0.78–2.37)   | 0.214        |
| Galacturonic acid-meto-5TMS                    | Urinary | 1.20 (0.85–1.83)   | 1.56 (0.74–2.55)    | 1.14 (0.94–1.79)   | 0.490        |
| Glucaric acid-6TMS                             | Urinary | 1.11 (0.84–1.62)   | 1.45 (0.86–2.13)    | 1.09 (0.83–1.48)   | 0.366        |
| Gluconic acid-6TMS                             | Urinary | 2.93 (1.95–4.29)   | 5.08 (1.93–5.51)    | 2.82 (1.88–3.90)   | 0.114        |
| Glucosamine-5TMS ( $\times 10^{-1}$ )          | Urinary | 3.40 (2.20–6.34)   | 5.78 (3.13–6.95)    | 3.35 (2.19–6.25)   | 0.290        |
| Glucose 6-phosphate-meto-6TMS                  | Urinary | 0 (0–0)            | 0 (0–0)             | 0 (0–0)            | 0.602        |
| Glucose-meto-5TMS ( $\times 10^{-1}$ )         | Urinary | 4.57 (3.21–7.76)   | 5.20 (2.60–8.50)    | 4.38 (3.25–7.08)   | 0.963        |
| Glucuronic acid-meto-5TMS                      | Urinary | 3.27 (2.04–5.19)   | 3.83 (1.57–5.51)    | 3.19 (2.18–4.00)   | 0.818        |
| Glutamic acid-3TMS ( $\times 10^{-1}$ )        | Urinary | 1.84 (1.34–2.74)   | 2.72 (1.44–3.29)    | 1.70 (1.32–2.60)   | 0.214        |
| Glutamine-3TMS ( $\times 10^{-1}$ )            | Urinary | 2.54 (1.14–5.11)   | 3.65 (2.60–6.14)    | 2.34 (1.08–5.20)   | 0.214        |
| Glyceric acid-3TMS ( $\times 10^{-1}$ )        | Urinary | 1.68 (0.99–2.30)   | 1.50 (0.82–1.89)    | 1.93 (1.06–2.38)   | 0.238        |
| Glycerol 3-phosphate-4TMS ( $\times 10^{-1}$ ) | Urinary | 2.66 (1.47–4.08)   | 3.70 (1.68–4.43)    | 2.51 (1.46–3.86)   | 0.382        |
| Glycine-3TMS                                   | Urinary | 11.93 (8.14–25.81) | 17.50 (12.37–28.87) | 10.27 (7.78–20.42) | 0.122        |
| Glycolic acid-2TMS                             | Urinary | 1.24 (0.93–1.85)   | 1.48 (0.87–2.38)    | 1.22 (0.92–1.81)   | 0.490        |
| Glycyl-Glycine-4TMS                            | Urinary | 0 (0–0)            | 0 (0–0)             | 0 (0–0)            | 0.056        |
| Guanine-3TMS ( $\times 10^{-2}$ )              | Urinary | 6.55 (3.14–9.89)   | 7.87 (4.98–11.56)   | 6.05 (2.38–7.93)   | 0.129        |
| Hippuric acid-TMS                              | Urinary | 1.65 (0.60–3.70)   | 2.62 (0.77–5.62)    | 1.42 (0.58–3.56)   | 0.490        |
| Histidine-3TMS                                 | Urinary | 3.06 (1.06–6.99)   | 5.36 (3.09–10.60)   | 2.19 (0.86–5.51)   | 0.083        |
| Homocysteine-3TMS ( $\times 10^{-2}$ )         | Urinary | 0.65 (0–2.02)      | 2.19 (0–3.95)       | 0.64 (0–1.69)      | 0.188        |
| Homogentisic acid-3TMS ( $\times 10^{-3}$ )    | Urinary | 0 (0–0)            | 0 (0–0)             | 0 (0–0)            | 0.137        |
| Homovanillic acid-2TMS ( $\times 10^{-2}$ )    | Urinary | 2.09 (1.00–4.50)   | 3.02 (0.74–5.28)    | 1.79 (1.04–4.21)   | 0.635        |
| Hydroquinone-2TMS ( $\times 10^{-2}$ )         | Urinary | 0 (0–1.17)         | 0 (0–1.63)          | 0 (0–1.19)         | 0.898        |
| Hydroxylamine-3TMS                             | Urinary | 0.84 (0.65–1.00)   | 0.67 (0.50–0.79)    | 0.90 (0.70–1.05)   | <b>0.007</b> |
| Hypotaurine-3TMS ( $\times 10^{-2}$ )          | Urinary | 0 (0–5.66)         | 0 (0–0.68)          | 1.94 (0–6.37)      | <b>0.043</b> |
| Hypoxanthine-2TMS ( $\times 10^{-1}$ )         | Urinary | 2.16 (1.25–3.43)   | 2.92 (1.82–3.97)    | 2.15 (1.14–3.42)   | 0.366        |
| Indol-3-acetic acid-TMS ( $\times 10^{-2}$ )   | Urinary | 1.75 (0–3.74)      | 1.50 (0.59–4.03)    | 1.82 (0–3.87)      | 0.721        |

|                                                 |         |                  |                  |                  |              |
|-------------------------------------------------|---------|------------------|------------------|------------------|--------------|
| Inositol-6TMS ( $\times 10^{-1}$ )              | Urinary | 2.48 (1.78–3.92) | 2.30 (1.77–3.00) | 2.70 (1.77–4.10) | 0.490        |
| Isobutyrylglycine-TMS                           | Urinary | 0 (0–0)          | 0 (0–0)          | 0 (0–0)          | 0.928        |
| Isocitric acid-4TMS                             | Urinary | 2.99 (2.35–5.69) | 4.63 (2.14–5.84) | 2.98 (2.40–5.64) | 0.890        |
| Isoleucine-2TMS ( $\times 10^{-1}$ )            | Urinary | 3.19 (1.56–4.53) | 3.47 (2.91–4.82) | 2.83 (1.46–4.34) | 0.334        |
| Isovalerylglycine-TMS ( $\times 10^{-3}$ )      | Urinary | 0 (0–0)          | 0 (0–2.37)       | 0 (0–0)          | 0.186        |
| Kynurenic acid-2TMS ( $\times 10^{-1}$ )        | Urinary | 1.17 (0.69–2.00) | 1.73 (0.65–3.32) | 1.14 (0.73–1.79) | 0.290        |
| Kynurenine-2TMS ( $\times 10^{-1}$ )            | Urinary | 0.59 (0.34–1.20) | 0.98 (0.36–1.29) | 0.52 (0.30–1.10) | 0.382        |
| Lactic acid-2TMS                                | Urinary | 0.86 (0.64–1.15) | 0.69 (0.55–0.91) | 0.97 (0.68–1.17) | <b>0.045</b> |
| Lactose-meto-8TMS ( $\times 10^{-2}$ )          | Urinary | 1.83 (1.05–5.14) | 2.44 (0.84–9.05) | 1.82 (0.99–4.51) | 0.373        |
| Lauric acid-TMS ( $\times 10^{-1}$ )            | Urinary | 0.85 (0.70–1.03) | 0.87 (0.68–0.99) | 0.84 (0.69–1.10) | 0.702        |
| Leucine-2TMS                                    | Urinary | 0.97 (0.50–1.48) | 1.21 (0.88–1.49) | 0.94 (0.49–1.49) | 0.417        |
| Linoleic acid-TMS ( $\times 10^{-2}$ )          | Urinary | 1.58 (1.30–2.11) | 1.57 (1.48–2.28) | 1.59 (1.25–2.10) | 0.334        |
| Lysine-4TMS ( $\times 10^{-1}$ )                | Urinary | 3.85 (1.46–6.90) | 4.93 (1.98–6.30) | 3.69 (1.37–7.88) | 0.592        |
| Lyxose-meto-4TMS ( $\times 10^{-1}$ )           | Urinary | 3.54 (2.54–5.31) | 4.03 (2.30–6.39) | 3.39 (2.49–5.16) | 0.399        |
| Maleic acid-2TMS ( $\times 10^{-2}$ )           | Urinary | 2.76 (1.76–5.15) | 4.10 (1.91–5.35) | 2.70 (1.76–5.06) | 0.725        |
| Malic acid-3TMS ( $\times 10^{-2}$ )            | Urinary | 0.43 (0–1.10)    | 0 (0–1.25)       | 0.45 (0–1.10)    | 0.530        |
| Malonic acid-2TMS ( $\times 10^{-2}$ )          | Urinary | 1.63 (1.04–2.29) | 1.27 (1.01–2.03) | 1.68 (1.12–2.67) | 0.263        |
| Mannitol-6TMS                                   | Urinary | 1.41 (0.87–2.92) | 1.25 (1.09–2.68) | 1.43 (0.80–3.05) | 0.748        |
| Mannose-meto-5TMS ( $\times 10^{-1}$ )          | Urinary | 0.59 (0.32–0.89) | 0.43 (0.20–0.69) | 0.64 (0.34–0.91) | 0.173        |
| Margaric acid-TMS ( $\times 10^{-2}$ )          | Urinary | 2.67 (2.20–3.40) | 2.69 (2.43–3.56) | 2.66 (2.15–3.29) | 0.530        |
| Mesaconic acid-2TMS ( $\times 10^{-1}$ )        | Urinary | 0.90 (0.57–1.79) | 0.85 (0.48–1.15) | 1.04 (0.57–1.93) | 0.382        |
| meso-Erythritol-4TMS ( $\times 10^{-1}$ )       | Urinary | 2.73 (1.81–4.07) | 2.95 (1.83–4.22) | 2.68 (1.70–4.08) | 0.842        |
| Methionine sulfone-2TMS ( $\times 10^{-2}$ )    | Urinary | 1.29 (0–2.45)    | 1.51 (0.96–2.67) | 1.27 (0–2.47)    | 0.438        |
| Methionine-2TMS ( $\times 10^{-2}$ )            | Urinary | 0 (0–1.11)       | 0 (0–1.63)       | 0 (0–0.87)       | 0.400        |
| Methylmalonic acid-2TMS ( $\times 10^{-2}$ )    | Urinary | 3.54 (2.75–5.05) | 3.38 (2.59–5.55) | 3.74 (2.73–5.08) | 0.988        |
| Methylsuccinic acid-2TMS ( $\times 10^{-2}$ )   | Urinary | 3.30 (2.42–5.93) | 3.09 (2.12–4.06) | 3.75 (2.40–6.37) | 0.399        |
| Myristic acid-TMS ( $\times 10^{-1}$ )          | Urinary | 1.23 (1.03–1.62) | 1.23 (1.08–1.82) | 1.23 (1.01–1.63) | 0.635        |
| N6-Acetyllysine-2TMS ( $\times 10^{-1}$ )       | Urinary | 1.94 (1.02–3.11) | 2.45 (1.86–2.87) | 1.51 (0.97–3.37) | 0.434        |
| N-Acetylaspartic acid-3TMS ( $\times 10^{-1}$ ) | Urinary | 1.00 (0.54–1.99) | 1.88 (0.78–3.03) | 0.85 (0.49–1.49) | 0.095        |

|                                                    |         |                     |                    |                     |              |
|----------------------------------------------------|---------|---------------------|--------------------|---------------------|--------------|
| N-Acetylglutamine-2TMS ( $\times 10^{-2}$ )        | Urinary | 1.50 (0.54–2.77)    | 2.59 (0.75–3.71)   | 1.43 (0.36–2.77)    | 0.235        |
| N-Acetylmannosamine-meto-4TMS ( $\times 10^{-2}$ ) | Urinary | 3.34 (2.39–4.75)    | 4.26 (2.24–6.18)   | 3.15 (2.38–4.47)    | 0.434        |
| N-Acetylneuraminic acid-6TMS ( $\times 10^{-1}$ )  | Urinary | 1.22 (0.85–1.87)    | 1.62 (0.77–2.51)   | 1.14 (0.87–1.68)    | 0.471        |
| N-Acetylserine-2TMS ( $\times 10^{-2}$ )           | Urinary | 0.83 (0–1.18)       | 1.15 (0–1.24)      | 0.59 (0–1.09)       | 0.355        |
| N-Acetyltyrosine-2TMS                              | Urinary | 0 (0–0)             | 0 (0–0)            | 0 (0–0)             | 0.354        |
| Niacinamide-TMS ( $\times 10^{-1}$ )               | Urinary | 0.77 (0.42–1.18)    | 0.65 (0.43–1.31)   | 0.81 (0.42–1.19)    | 0.635        |
| Nicotinic acid-TMS ( $\times 10^{-2}$ )            | Urinary | 3.42 (1.20–7.61)    | 0.99 (0.35–1.37)   | 5.42 (1.97–8.78)    | <b>0.001</b> |
| Nonanoic acid-TMS ( $\times 10^{-1}$ )             | Urinary | 3.46 (2.86–4.03)    | 3.10 (2.53–3.65)   | 3.53 (2.96–4.06)    | 0.108        |
| Norepinephrine-5TMS ( $\times 10^{-1}$ )           | Urinary | 1.19 (0.76–1.75)    | 1.18 (0.58–2.20)   | 1.19 (0.79–1.77)    | 0.702        |
| Norvaline-2TMS ( $\times 10^{-2}$ )                | Urinary | 0 (0–1.05)          | 0 (0–1.01)         | 0 (0–1.23)          | 0.722        |
| Octadecanol-TMS ( $\times 10^{-1}$ )               | Urinary | 2.16 (1.94–2.79)    | 2.24 (2.02–2.98)   | 2.13 (1.91–2.70)    | 0.382        |
| Octanoic acid-TMS ( $\times 10^{-2}$ )             | Urinary | 5.80 (4.98–7.31)    | 5.34 (4.88–7.17)   | 5.89 (5.14–7.37)    | 0.453        |
| Oleamide-TMS ( $\times 10^{-1}$ )                  | Urinary | 2.50 (1.78–3.78)    | 2.54 (1.99–4.26)   | 2.47 (1.67–3.70)    | 0.571        |
| Oleic acid-TMS ( $\times 10^{-1}$ )                | Urinary | 1.04 (0.73–1.33)    | 1.22 (1.09–1.35)   | 0.97 (0.66–1.56)    | 0.137        |
| O-Phosphoethanolamine-4TMS                         | Urinary | 0 (0–0)             | 0 (0–0)            | 0 (0–0)             | 0.524        |
| Ornithine-4TMS ( $\times 10^{-1}$ )                | Urinary | 3.50 (1.77–6.08)    | 4.07 (2.01–4.89)   | 3.50 (1.76–6.32)    | 0.818        |
| Oxalic acid-2TMS ( $\times 10^{-1}$ )              | Urinary | 3.78 (2.95–4.26)    | 3.75 (2.65–4.06)   | 3.78 (3.12–4.50)    | 0.305        |
| Palmitic acid-TMS                                  | Urinary | 3.27 (2.77–3.85)    | 3.32 (3.03–4.19)   | 3.26 (2.66–3.80)    | 0.290        |
| Palmitoleic acid-TMS ( $\times 10^{-2}$ )          | Urinary | 1.06 (0.67–1.93)    | 1.57 (0.76–2.11)   | 1.04 (0.64–1.86)    | 0.489        |
| Pantothenic acid-3TMS ( $\times 10^{-2}$ )         | Urinary | 1.05 (0–2.06)       | 1.51 (0.60–2.83)   | 0.95 (0–1.85)       | 0.330        |
| ParaXanthine-TMS ( $\times 10^{-2}$ )              | Urinary | 3.78 (1.52–8.06)    | 1.53 (0.33–3.38)   | 4.67 (2.68–8.45)    | <b>0.016</b> |
| Phenylalanine-2TMS                                 | Urinary | 1.50 (0.72–1.92)    | 1.79 (1.28–2.10)   | 0.96 (0.69–1.88)    | 0.154        |
| Phenylpyruvic acid-meto-TMS                        | Urinary | 0 (0–0)             | 0 (0–0)            | 0 (0–0)             | 0.602        |
| Phosphoric acid-3TMS                               | Urinary | 137.6 (102.2–171.4) | 120.0 (94.3–175.1) | 139.7 (101.4–170.6) | 0.613        |
| Pimelic acid-2TMS ( $\times 10^{-2}$ )             | Urinary | 0 (0–0.45)          | 0 (0–0)            | 0 (0–0.66)          | 0.259        |
| Proline-2TMS ( $\times 10^{-2}$ )                  | Urinary | 4.18 (2.21–6.31)    | 4.53 (1.85–6.15)   | 4.02 (2.46–6.44)    | 0.866        |
| Protocatechuic acid-3TMS ( $\times 10^{-3}$ )      | Urinary | 0 (0–0)             | 0 (0–2.57)         | 0 (0–0)             | <b>0.043</b> |
| Psicose-meto-5TMS ( $\times 10^{-1}$ )             | Urinary | 1.64 (0.92–5.18)    | 2.74 (0.49–1.07)   | 1.41 (1.01–3.65)    | 0.530        |
| Putrescine-4TMS ( $\times 10^{-1}$ )               | Urinary | 1.35 (0.94–1.92)    | 1.25 (0.64–1.93)   | 1.36 (0.97–1.93)    | 0.613        |

|                                                   |         |                  |                   |                  |       |
|---------------------------------------------------|---------|------------------|-------------------|------------------|-------|
| Pyridoxal-meto-2TMS                               | Urinary | 0 (0–0)          | 0 (0–0)           | 0 (0–0)          | 0.892 |
| Pyrogallol-3TMS ( $\times 10^{-1}$ )              | Urinary | 0.75 (0.28–3.24) | 0.78 (0.32–11.28) | 0.72 (0.27–3.04) | 0.530 |
| Pyruvic acid-meto-TMS ( $\times 10^{-1}$ )        | Urinary | 3.13 (2.10–3.73) | 2.90 (1.62–3.89)  | 3.19 (2.17–3.70) | 0.794 |
| Quinolinic acid-2TMS ( $\times 10^{-1}$ )         | Urinary | 3.36 (2.47–5.31) | 4.18 (2.30–6.91)  | 3.32 (2.36–4.24) | 0.399 |
| Ribitol-5TMS ( $\times 10^{-1}$ )                 | Urinary | 0.80 (0.51–1.34) | 1.02 (0.66–1.56)  | 0.66 (0.48–1.29) | 0.350 |
| Ribonic acid-5TMS                                 | Urinary | 1.45 (0.99–2.01) | 1.70 (1.07–2.38)  | 1.35 (0.98–1.91) | 0.203 |
| Ribonolactone-3TMS ( $\times 10^{-2}$ )           | Urinary | 5.83 (3.42–8.61) | 6.60 (4.05–9.89)  | 5.81 (3.37–8.49) | 0.530 |
| Ribose 5-phosphate-meto-5TMS ( $\times 10^{-3}$ ) | Urinary | 0 (0–1.28)       | 0 (0–8.05)        | 0 (0–0)          | 0.176 |
| Ribose-meto-4TMS ( $\times 10^{-1}$ )             | Urinary | 0.87 (0.59–1.23) | 0.91 (0.55–1.51)  | 0.83 (0.58–1.12) | 0.399 |
| Ribulose-meto-4TMS ( $\times 10^{-1}$ )           | Urinary | 1.62 (1.08–2.42) | 2.23 (0.97–3.25)  | 1.54 (1.08–2.27) | 0.530 |
| Saccharopine-4TMS                                 | Urinary | 0 (0–0)          | 0 (0–0)           | 0 (0–0)          | 0.602 |
| Sebacic acid-2TMS                                 | Urinary | 0 (0–0)          | 0 (0–0)           | 0 (0–0)          | 0.354 |
| Serine-3TMS                                       | Urinary | 1.67 (1.06–2.78) | 1.73 (1.46–3.64)  | 1.52 (0.91–2.39) | 0.290 |
| Sorbitol-6TMS ( $\times 10^{-1}$ )                | Urinary | 3.91 (2.82–5.49) | 4.53 (3.23–7.23)  | 3.78 (2.73–4.84) | 0.145 |
| Sorbose-meto-5TMS ( $\times 10^{-2}$ )            | Urinary | 3.79 (1.90–7.94) | 3.87 (1.89–12.82) | 3.76 (1.95–7.09) | 0.399 |
| Spermidine-5TMS ( $\times 10^{-3}$ )              | Urinary | 0 (0–0)          | 0 (0–8.54)        | 0 (0–0)          | 0.688 |
| Spermine-6TMS ( $\times 10^{-1}$ )                | Urinary | 1.02 (0.48–1.36) | 1.04 (0.64–1.35)  | 1.01 (0.44–1.36) | 0.613 |
| Stearic acid-TMS                                  | Urinary | 2.55 (2.34–3.17) | 2.45 (2.40–3.20)  | 2.58 (2.26–3.17) | 0.939 |
| Suberic acid-2TMS ( $\times 10^{-2}$ )            | Urinary | 0.46 (0–1.76)    | 0 (0–0.46)        | 0.88 (0–2.32)    | 0.101 |
| Succinic acid-2TMS ( $\times 10^{-1}$ )           | Urinary | 0.91 (0.68–1.18) | 0.95 (0.75–1.28)  | 0.91 (0.68–1.14) | 0.635 |
| Sucrose-8TMS                                      | Urinary | 0.18 (0.10–0.38) | 1.08 (0.04–1.20)  | 0.18 (0.11–0.33) | 0.250 |
| Tagatose-meto-5TMS ( $\times 10^{-1}$ )           | Urinary | 0.38 (0.18–1.19) | 0.93 (0.10–1.37)  | 0.36 (0.18–0.89) | 0.334 |
| Tartaric acid-4TMS                                | Urinary | 0.14 (0.07–0.91) | 0.12 (0.02–1.01)  | 0.15 (0.08–0.75) | 0.635 |
| Taurine-13C2-3TMS ( $\times 10^{-1}$ )            | Urinary | 0.59 (0.28–1.11) | 0.49 (0.23–0.88)  | 0.67 (0.29–1.16) | 0.550 |
| Thiodiglycolic acid-2TMS ( $\times 10^{-3}$ )     | Urinary | 0 (0–0)          | 0 (0–6.60)        | 0 (0–0)          | 0.052 |
| Threitol-4TMS ( $\times 10^{-1}$ )                | Urinary | 1.28 (0.67–1.95) | 1.25 (0.53–2.51)  | 1.31 (0.73–1.87) | 0.988 |
| Threonic acid-4TMS                                | Urinary | 1.54 (0.89–2.28) | 2.04 (1.01–2.54)  | 1.46 (0.88–2.24) | 0.350 |
| Threonine-3TMS ( $\times 10^{-1}$ )               | Urinary | 3.17 (1.91–4.93) | 3.56 (2.69–5.23)  | 3.14 (1.80–5.04) | 0.434 |
| Tiglylglycine-TMS                                 | Urinary | 0 (0–0)          | 0 (0–0)           | 0 (0–0)          | 0.892 |

|                                                |         |                     |                     |                     |       |
|------------------------------------------------|---------|---------------------|---------------------|---------------------|-------|
| Trehalose-8TMS ( $\times 10^{-2}$ )            | Urinary | 2.07 (0–7.97)       | 1.48 (0–16.58)      | 2.21 (1.05–6.80)    | 0.963 |
| Triethanolamine-3TMS ( $\times 10^{-2}$ )      | Urinary | 0 (0–1.55)          | 0 (0–1.51)          | 0 (0–1.64)          | 0.956 |
| Tryptophan-3TMS ( $\times 10^{-1}$ )           | Urinary | 1.36 (0.72–2.11)    | 1.47 (1.14–1.73)    | 1.25 (0.65–2.30)    | 0.890 |
| Tyramine-3TMS ( $\times 10^{-1}$ )             | Urinary | 2.36 (1.69–3.80)    | 3.74 (1.94–7.25)    | 2.34 (1.63–3.61)    | 0.145 |
| Tyrosine-3TMS                                  | Urinary | 3.10 (1.63–5.57)    | 3.92 (2.29–5.77)    | 2.97 (1.48–5.51)    | 0.319 |
| Uracil-2TMS ( $\times 10^{-2}$ )               | Urinary | 0.17 (0–0.85)       | 0.59 (0–1.71)       | 0 (0–0.78)          | 0.232 |
| Urea-2TMS                                      | Urinary | 200.3 (151.4–248.7) | 172.1 (150.3–237.0) | 201.0 (165.3–255.9) | 0.702 |
| Ureidopropionic acid-2TMS ( $\times 10^{-3}$ ) | Urinary | 0 (0–8.79)          | 8.46 (0–9.92)       | 0 (0–4.93)          | 0.254 |
| Uric acid-4TMS                                 | Urinary | 4.43 (3.07–6.20)    | 4.48 (3.00–7.53)    | 4.37 (3.06–5.75)    | 0.771 |
| Urocanic acid-2TMS ( $\times 10^{-1}$ )        | Urinary | 1.37 (1.01–2.07)    | 2.08 (1.03–2.54)    | 1.25 (0.99–1.69)    | 0.163 |
| Valine-2TMS                                    | Urinary | 1.40 (0.77–1.80)    | 1.64 (1.11–1.91)    | 1.27 (0.75–1.80)    | 0.334 |
| Vanilmandelic acid-3TMS ( $\times 10^{-1}$ )   | Urinary | 5.01 (2.59–5.90)    | 5.52 (2.29–8.37)    | 4.94 (2.76–5.71)    | 0.471 |
| Xanthine-3TMS ( $\times 10^{-1}$ )             | Urinary | 0.54 (0.32–0.96)    | 0.54 (0.37–1.33)    | 0.55 (0.31–0.92)    | 0.771 |
| Xanthosine-5TMS ( $\times 10^{-2}$ )           | Urinary | 0.86 (0–1.55)       | 1.08 (0.27–1.43)    | 0.82 (0–1.61)       | 0.518 |
| Xylitol-5TMS ( $\times 10^{-1}$ )              | Urinary | 1.02 (0.65–1.65)    | 1.37 (0.64–2.22)    | 0.97 (0.64–1.54)    | 0.550 |
| Xylose-meto-4TMS ( $\times 10^{-1}$ )          | Urinary | 1.17 (0.55–1.79)    | 1.20 (0.36–1.65)    | 1.16 (0.59–1.94)    | 0.510 |
| Xylulose-meto-4TMS ( $\times 10^{-1}$ )        | Urinary | 1.97 (1.30–3.10)    | 3.05 (1.05–3.57)    | 1.87 (1.33–2.80)    | 0.550 |

Abbreviations: IQR, Interquartile range; arb.unit, arbitrary unit; AHU, asymptomatic hyperuricemia; Raw P values were calculated from Mann–Whitney U test comparing asymptomatic hyperuricemia group to all gout group (without the Benjamini-Hochberg adjustment).

**Table S2. Summary of multivariate and univariate analysis results among asymptomatic hyperuricemia, gout with SUA <9.0 mg/dL, and gout with SUA ≥9.0 mg/dL groups.**

| Compound name [arb.unit]                             | Sample        | VIP <sup>1</sup> | VIP <sup>2</sup> | Median (IQR: Q1-Q3) |                       |                       | Raw P <sup>3</sup> | Raw P <sup>4</sup> |
|------------------------------------------------------|---------------|------------------|------------------|---------------------|-----------------------|-----------------------|--------------------|--------------------|
|                                                      |               |                  |                  | AHU                 | Gout (SUA <9.0 mg/dL) | Gout (SUA ≥9.0 mg/dL) |                    |                    |
| <b>2-Isopropylmalic acid-3TMS</b>                    | <b>Plasma</b> |                  |                  | <b>1</b>            | <b>1</b>              | <b>1</b>              | <b>Reference</b>   |                    |
| 1,5-Anhydro-glucitol-4TMS (×10 <sup>-2</sup> )       | Plasma        | 1.509            | 1.621            | 0.86 (0.67–1.48)    | 0.60 (0–1.09)         | 0.53 (0–0.89)         | 0.163              | 0.073              |
| 1,6-Anhydroglucose-3TMS (×10 <sup>-2</sup> )         | Plasma        | 0.556            | 0.115            | 0.63 (0–1.07)       | 0.83 (0–1.05)         | 0.75 (0–0.94)         | 0.85               | 0.994              |
| 1-Hexadecanol-TMS (×10 <sup>-2</sup> )               | Plasma        | 0.349            | 0.454            | 2.46 (2.09–2.53)    | 2.14 (1.63–2.74)      | 1.87 (1.62–2.52)      | 0.99               | 0.413              |
| 2-Aminoadipic acid-3TMS (×10 <sup>-3</sup> )         | Plasma        | 1.292            | 0.659            | 4.88 (0–8.35)       | 0 (0–5.35)            | 0 (0–14.40)           | 0.487              | 0.94               |
| 2-Aminobutyric acid-2TMS (×10 <sup>-2</sup> )        | Plasma        | 0.919            | 0.571            | 4.02 (3.77–5.79)    | 4.46 (3.27–6.79)      | 4.04 (2.98–5.41)      | 0.942              | 0.793              |
| 2-Aminoethanol-3TMS (×10 <sup>-1</sup> )             | Plasma        | 0.511            | 0.677            | 3.59 (2.96–4.29)    | 3.48 (3.04–4.14)      | 3.44 (2.84–3.99)      | 0.99               | 0.793              |
| 2-Aminoisobutyric acid-2TMS (×10 <sup>-2</sup> )     | Plasma        | 0.682            | 0.853            | 6.83 (5.26–8.02)    | 6.70 (5.62–7.56)      | 6.30 (5.54–7.41)      | 0.998              | 0.968              |
| 2-Aminopimelic acid-3TMS (×10 <sup>-1</sup> )        | Plasma        | 0.786            | 1.29             | 2.14 (1.97–2.48)    | 2.49 (2.21–)2.69      | 2.71 (2.33–2.90)      | 0.396              | 0.099              |
| 2-Deoxy-glucose-4TMS (×10 <sup>-1</sup> )            | Plasma        | 1.171            | 0.705            | 1.01 (0.83–1.27)    | 1.13 (0.87–1.78)      | 1.16 (0.83–1.35)      | 0.497              | 0.793              |
| 2-Hydroxybutyric acid-2TMS (×10 <sup>-1</sup> )      | Plasma        | 0.957            | 1.445            | 1.39 (1.09–2.02)    | 1.61 (1.43–2.05)      | 2.11 (1.56–2.37)      | 0.283              | 0.195              |
| 2-Hydroxyglutaric acid-3TMS (×10 <sup>-2</sup> )     | Plasma        | 0.743            | 0.329            | 1.14 (1.07–1.60)    | 1.42 (0.92–1.84)      | 1.41 (0.96–1.64)      | 0.979              | 0.984              |
| 2-Hydroxyisobutyric acid-2TMS (×10 <sup>-2</sup> )   | Plasma        | 0.495            | 1.025            | 0.93 (0.80–1.21)    | 1.05 (0.71–1.97)      | 1.17 (0.89–1.48)      | 0.942              | 0.348              |
| 2-Hydroxyisovaleric acid-2TMS (×10 <sup>-2</sup> )   | Plasma        | 0.921            | 0.906            | 3.55 (3.25–4.31)    | 3.26 (2.24–7.18)      | 5.00 (2.92–6.23)      | 0.962              | 0.38               |
| 2-Ketobutyric acid-meto-TMS (×10 <sup>-2</sup> )     | Plasma        | 0.776            | 1.338            | 2.14 (1.73–2.64)    | 2.45 (1.82–2.90)      | 2.77 (2.31–3.14)      | 0.532              | 0.141              |
| 2-Ketoglutaric acid-meto-2TMS (×10 <sup>-2</sup> )   | Plasma        | 1.876            | 2.362            | 5.18 (4.61–5.85)    | 6.61 (5.66–8.14)      | 8.11 (7.05–9.14)      | <b>0.027</b>       | <b>&lt;0.001</b>   |
| 2-Ketoisocaproic acid-meto-TMS (×10 <sup>-1</sup> )  | Plasma        | 0.543            | 0.914            | 1.22 (1.17–1.60)    | 1.33 (0.99–1.67)      | 1.42 (1.17–1.74)      | 0.998              | 0.716              |
| 2-Keto-isovaleric acid-meto-TMS (×10 <sup>-2</sup> ) | Plasma        | 0.957            | 1.166            | 2.08 (1.86–2.43)    | 1.90 (1.47–2.48)      | 2.39 (2.12–2.87)      | 0.606              | 0.264              |
| 3-Aminoglutaric acid-2TMS (×10 <sup>-2</sup> )       | Plasma        | 1.261            | 0.496            | 6.97 (0.34–9.39)    | 0 (0–7.94)            | 1.53 (0–9.97)         | 0.311              | 0.709              |
| 3-Aminoisobutyric acid-3TMS (×10 <sup>-3</sup> )     | Plasma        | 1.217            | 1.481            | 0 (0–0)             | 0 (0–7.20)            | 3.17 (0–15.03)        | 0.297              | 0.103              |
| 3-Aminopropanoic acid-3TMS (×10 <sup>-2</sup> )      | Plasma        | 0.841            | 0.933            | 3.96 (2.28–5.78)    | 3.22 (0–6.56)         | 4.13 (1.34–10.99)     | 0.99               | 0.864              |
| 3-Hydroxybutyric acid-2TMS (×10 <sup>-1</sup> )      | Plasma        | 1.07             | 0.872            | 4.04 (2.67–5.06)    | 4.04 (3.35–7.70)      | 3.99 (3.35–7.70)      | 0.569              | 0.558              |
| 3-Hydroxyglutaric acid-3TMS (×10 <sup>-1</sup> )     | Plasma        | 0.568            | 0.528            | 8.03 (7.85–8.20)    | 7.97 (7.80–8.19)      | 7.96 (7.80–8.19)      | 0.89               | 0.83               |
| 3-Hydroxyisobutyric acid-2TMS (×10 <sup>-1</sup> )   | Plasma        | 1.064            | 1.043            | 1.84 (1.25–2.25)    | 1.68 (1.50–2.33)      | 2.21 (1.47–2.67)      | 0.86               | 0.195              |

|                                                          |        |       |       |                   |                   |                   |       |              |
|----------------------------------------------------------|--------|-------|-------|-------------------|-------------------|-------------------|-------|--------------|
| 3-Hydroxyisovaleric acid-2TMS ( $\times 10^{-2}$ )       | Plasma | 0.787 | 1.011 | 4.79 (3.42–5.29)  | 4.67 (3.74–5.36)  | 4.90 (4.34–5.34)  | 0.793 | 0.483        |
| 3-Hydroxypropionic acid-2TMS ( $\times 10^{-2}$ )        | Plasma | 1.491 | 0.208 | 6.45 (5.63–8.04)  | 7.87 (660–8.33)   | 6.78 (6.07–7.97)  | 0.235 | 0.968        |
| 3-Methyl-2-oxovaleric acid-meto-TMS ( $\times 10^{-1}$ ) | Plasma | 0.73  | 1.236 | 1.22 (0.96–1.40)  | 1.16 (0.94–1.64)  | 1.46 (1.07–1.67)  | 0.999 | 0.264        |
| 3-Phenyllactic acid-2TMS ( $\times 10^{-3}$ )            | Plasma | 1.003 | 1.061 | 0 (0–7.59)        | 5.25 (0–9.05)     | 6.06 (0–1.09)     | 0.557 | 0.299        |
| 4-Aminobutyric acid-3TMS                                 | Plasma | 0.685 | 0.682 | 0 (0–0)           | 0 (0–0)           | 0 (0–0)           | 0.905 | 0.878        |
| 4-Hydroxyphenyllactic acid-3TMS ( $\times 10^{-2}$ )     | Plasma | 1.042 | 1.242 | 5.09 (4.14–7.47)  | 6.65 (4.60–7.79)  | 7.25 (5.16–9.54)  | 0.532 | 0.195        |
| 4-Hydroxyphenylpyruvic acid-meto-2TMS                    | Plasma | 0.704 | 0.646 | 0 (0–0)           | 0 (0–0)           | 0 (0–0)           | 0.719 | 0.706        |
| 4-Hydroxyproline-3TMS ( $\times 10^{-1}$ )               | Plasma | 1.266 | 0.33  | 3.15 (0.20–4.00)  | 0.80 (0.07–3.23)  | 1.06 (0.08–4.95)  | 0.336 | 0.923        |
| 5-Hydroxymethyl-2-furoic acid-2TMS                       | Plasma | 1.259 | 0     | 0 (0–0)           | 0 (0–0)           | 0 (0–0)           | 0.719 | 0.999        |
| 5-Methoxytryptamine-2TMS ( $\times 10^{-2}$ )            | Plasma | 0.339 | 1.177 | 1.65 (0.34–2.91)  | 1.73 (0.47–3.32)  | 1.32 (0.95–1.69)  | 0.998 | 0.793        |
| 5-Oxoproline-2TMS                                        | Plasma | 1.658 | 1.541 | 7.77 (6.71–8.75)  | 6.86 (5.90–7.71)  | 6.86 (5.22–7.75)  | 0.193 | 0.141        |
| Acetoacetic acid-meto-TMS                                | Plasma | 0.993 | 0.803 | 0 (0–0)           | 0 (0–0)           | 0 (0–0)           | 0.483 | 0.706        |
| Acetylglycine-TMS                                        | Plasma | 0.948 | 0.894 | 0 (0–0)           | 0 (0–0)           | 0 (0–0)           | 0.483 | 0.463        |
| Aconitic acid-3TMS ( $\times 10^{-3}$ )                  | Plasma | 1.173 | 1.789 | 0 (0–0)           | 0 (0–0)           | 0 (0–9.43)        | 0.325 | <b>0.047</b> |
| Adipic acid-2TMS ( $\times 10^{-3}$ )                    | Plasma | 0.526 | 0.377 | 9.25 (2.48–12.48) | 8.51 (2.89–14.80) | 6.80 (4.28–9.80)  | 0.917 | 0.923        |
| Alanine-2TMS                                             | Plasma | 0.817 | 0.488 | 24.4 (21.1–27.5)  | 22.6 (20.1–27.4)  | 25.2 (19.4–28.3)  | 0.644 | 0.999        |
| Allose-meto-5TMS ( $\times 10^{-2}$ )                    | Plasma | 1.224 | 1.174 | 7.50 (5.78–9.90)  | 9.47 (6.30–11.18) | 8.77 (6.61–11.70) | 0.497 | 0.413        |
| Arabitol-5TMS ( $\times 10^{-2}$ )                       | Plasma | 0.775 | 0.785 | 0 (0–0.88)        | 0.53 (0–1.08)     | 0.63 (0–1.37)     | 0.597 | 0.473        |
| Arachidonic acid-TMS ( $\times 10^{-1}$ )                | Plasma | 1.384 | 2.285 | 0.85 (0.73–1.02)  | 0.76 (0.52–0.87)  | 0.56 (0.39–0.76)  | 0.235 | <b>0.007</b> |
| Arginine-3TMS ( $\times 10^{-2}$ )                       | Plasma | 0.957 | 0.327 | 2.19 (1.12–3.00)  | 1.83 (0–3.21)     | 1.90 (0.62–4.15)  | 0.791 | 0.948        |
| Asparagine-3TMS ( $\times 10^{-2}$ )                     | Plasma | 1.286 | 0.548 | 6.38 (0–7.56)     | 0.67 (0–5.61)     | 1.65 (0–5.34)     | 0.5   | 0.781        |
| Aspartic acid-3TMS ( $\times 10^{-2}$ )                  | Plasma | 1.282 | 0.546 | 6.46 (0–8.76)     | 0 (0–7.48)        | 1.23 (0–8.66)     | 0.378 | 0.785        |
| Azelaic acid-2TMS                                        | Plasma | 0.696 | 0.772 | 0 (0–0)           | 0 (0–0)           | 0 (0–0)           | 0.999 | 0.866        |
| Benzoic acid-TMS ( $\times 10^{-1}$ )                    | Plasma | 1.096 | 0.62  | 5.40 (4.68–6.27)  | 5.91 (4.91–7.50)  | 5.27 (4.83–6.35)  | 0.428 | 0.968        |
| Caproic acid-TMS ( $\times 10^{-1}$ )                    | Plasma | 0.51  | 1.696 | 1.30 (1.07–1.41)  | 1.28 (1.07–1.51)  | 1.09 (0.71–1.21)  | 0.962 | 0.087        |
| Cholesterol-TMS ( $\times 10^{-2}$ )                     | Plasma | 1.412 | 0.645 | 1.30 (0.79–1.51)  | 0.86 (0–1.14)     | 0.97 (0.81–1.12)  | 0.18  | 0.539        |
| Citramalic acid-3TMS ( $\times 10^{-2}$ )                | Plasma | 0.661 | 0.363 | 0.94 (0–1.21)     | 0.76 (0–0.98)     | 0.64 (0–1.15)     | 0.633 | 0.822        |
| Citric acid-4TMS ( $\times 10^{-1}$ )                    | Plasma | 0.529 | 1.09  | 3.16 (2.94–3.79)  | 3.51 (3.17–3.86)  | 3.94 (3.32–4.39)  | 0.86  | 0.264        |
| Citrulline-3TMS                                          | Plasma | 0     | 0.646 | 0 (0–0)           | 0 (0–0)           | 0 (0–0)           | 0.999 | 0.706        |

|                                                  |        |       |       |                   |                   |                  |              |              |
|--------------------------------------------------|--------|-------|-------|-------------------|-------------------|------------------|--------------|--------------|
| Creatinine-3TMS ( $\times 10^{-3}$ )             | Plasma | 0.658 | 0.62  | 0 (0–6.63)        | 0 (0–2.46)        | 0 (0–7.70)       | 0.784        | 0.898        |
| Cystamine-nTMS                                   | Plasma | 0     | 0.645 | 0 (0–0)           | 0 (0–0)           | 0 (0–0)          | 0.999        | 0.706        |
| Cysteine-3TMS ( $\times 10^{-2}$ )               | Plasma | 1.693 | 1.054 | 7.64 (0.31–11.68) | 1.70 (0–5.88)     | 2.14 (0–8.56)    | 0.147        | 0.44         |
| Cystine-4TMS ( $\times 10^{-2}$ )                | Plasma | 1.387 | 1.434 | 2.58 (1.62–3.01)  | 3.40 (2.26–4.32)  | 3.16 (2.58–5.31) | 0.157        | 0.141        |
| Decanoic acid-TMS ( $\times 10^{-2}$ )           | Plasma | 0.616 | 0.335 | 6.66 (6.02–7.09)  | 6.75 (5.76–7.38)  | 6.24 (5.12–8.14) | 0.918        | 0.793        |
| Docosahexaenoic acid-TMS ( $\times 10^{-2}$ )    | Plasma | 1.612 | 0.968 | 0.55 (0–1.45)     | 1.55 (0.59–2.17)  | 1.06 (0.19–1.70) | 0.134        | 0.473        |
| Eicosapentaenoic acid-TMS ( $\times 10^{-2}$ )   | Plasma | 1.646 | 2.4   | 9.31 (7.38–9.53)  | 7.51 (5.47–8.92)  | 5.70 (4.35–7.58) | 0.175        | <b>0.008</b> |
| Elaidic acid-TMS ( $\times 10^{-2}$ )            | Plasma | 1.186 | 1.175 | 4.99 (3.78–6.12)  | 6.10 (4.94–7.98)  | 6.81 (5.02–9.88) | 0.127        | 0.077        |
| Fructose-meto-5TMS ( $\times 10^{-2}$ )          | Plasma | 1.016 | 1.532 | 2.36 (1.81–5.55)  | 2.36 (1.36–3.36)  | 1.48 (1.12–2.35) | 0.624        | 0.087        |
| Fumaric acid-2TMS ( $\times 10^{-2}$ )           | Plasma | 0.355 | 0.833 | 1.82 (1.50–2.27)  | 2.02 (1.87–2.48)  | 2.00 (1.71–2.49) | 0.213        | 0.38         |
| Galacturonic acid-meto-5TMS ( $\times 10^{-2}$ ) | Plasma | 0.735 | 0.91  | 0 (0–0.74)        | 0 (0–0)           | 0.25 (0–1.37)    | 0.86         | 0.421        |
| Glucaric acid-6TMS ( $\times 10^{-2}$ )          | Plasma | 0.838 | 1.278 | 0.91 (0.32–1.13)  | 1.00 (0.60–1.34)  | 1.14 (0.91–2.00) | 0.567        | 0.124        |
| Gluconic acid-6TMS ( $\times 10^{-2}$ )          | Plasma | 0.897 | 0.911 | 3.58 (2.80–4.27)  | 3.09 (2.65–3.94)  | 3.86 (2.87–4.71) | 0.682        | 0.755        |
| Glucosamine-5TMS ( $\times 10^{-2}$ )            | Plasma | 0.347 | 1.358 | 1.85 (1.60–2.23)  | 1.90 (1.50–2.57)  | 1.66 (0.16–2.08) | 0.918        | 0.446        |
| Glucose-meto-5TMS                                | Plasma | 2.01  | 1.85  | 5.88 (4.93–6.75)  | 7.92 (6.49–9.31)  | 7.05 (6.24–8.95) | <b>0.024</b> | <b>0.029</b> |
| Glucuronic acid-meto-5TMS ( $\times 10^{-2}$ )   | Plasma | 0.549 | 1.195 | 1.73 (1.10–2.16)  | 1.88 (1.25–2.69)  | 2.25 (1.84–3.07) | 0.756        | 0.157        |
| Glutamic acid-3TMS ( $\times 10^{-1}$ )          | Plasma | 1.392 | 0.339 | 4.59 (0.58–7.09)  | 0.49 (0.09–4.90)  | 2.82 (0.31–5.84) | 0.447        | 0.113        |
| Glutamine-3TMS ( $\times 10^{-1}$ )              | Plasma | 1.471 | 0.372 | 7.33 (1.71–9.59)  | 3.08 (0.93–7.98)  | 4.82 (1.42–9.71) | 0.337        | 0.793        |
| Glutaric acid-2TMS ( $\times 10^{-2}$ )          | Plasma | 0.759 | 0.072 | 1.65 (1.35–1.76)  | 1.64 (1.25–2.26)  | 1.45 (1.01–2.26) | 0.81         | 0.989        |
| Glyceric acid-3TMS ( $\times 10^{-1}$ )          | Plasma | 0.955 | 0.733 | 1.28 (1.21–1.68)  | 1.28 (1.14–1.56)  | 1.24 (1.10–1.56) | 0.962        | 0.558        |
| Glycerol 3-phosphate-4TMS ( $\times 10^{-2}$ )   | Plasma | 1.154 | 1.415 | 0 (0–0.94)        | 1.01 (0–1.27)     | 0.90 (0.16–1.35) | 0.322        | 0.177        |
| Glycerol-3TMS ( $\times 10^{-1}$ )               | Plasma | 1.15  | 0.988 | 1.06 (0.79–1.23)  | 1.19 (0.86–1.47)  | 0.82 (0.76–1.12) | 0.497        | 0.483        |
| Glycine-3TMS                                     | Plasma | 1.404 | 1.086 | 5.92 (4.09–7.49)  | 4.86 (3.13–5.77)  | 4.10 (3.04–5.31) | 0.309        | 0.176        |
| Glycolic acid-2TMS ( $\times 10^{-1}$ )          | Plasma | 0.425 | 0.457 | 2.19 (1.91–2.45)  | 2.12 (1.94–2.48)  | 2.22 (1.84–2.29) | 0.942        | 0.968        |
| Glyoxylic acid-meto-TMS ( $\times 10^{-1}$ )     | Plasma | 1.162 | 0.358 | 5.06 (4.73–5.31)  | 5.11 (4.66–6.04)  | 4.75 (4.19–5.40) | 0.719        | 0.755        |
| Histidine-3TMS ( $\times 10^{-1}$ )              | Plasma | 1.067 | 0.461 | 1.64 (0.93–2.91)  | 1.13 (0.26–2.32)  | 1.50 (0.56–3.94) | 0.396        | 0.83         |
| Homocysteine-3TMS                                | Plasma | 0     | 0.803 | 0 (0–0)           | 0 (0–0)           | 0 (0–0)          | 0.999        | 0.706        |
| Hydroxylamine-3TMS ( $\times 10^{-1}$ )          | Plasma | 1.329 | 0.681 | 6.24 (4.48–6.86)  | 7.61 (5.60–9.967) | 6.62 (5.54–8.18) | 0.175        | 0.558        |
| Hypotaurine-3TMS ( $\times 10^{-2}$ )            | Plasma | 0.301 | 0.641 | 0.84 (0–1.11)     | 0.49 (0–1.56)     | 1.00 (0–1.74)    | 0.999        | 0.584        |



|                                               |        |       |       |                  |                  |                   |       |                  |
|-----------------------------------------------|--------|-------|-------|------------------|------------------|-------------------|-------|------------------|
| Hypoxanthine-2TMS ( $\times 10^{-2}$ )        | Plasma | 1.003 | 0.209 | 0 (0–1.18)       | 0 (0–0.39)       | 0 (0–1.09)        | 0.463 | 0.979            |
| Indol-3-acetic acid-2TMS ( $\times 10^{-2}$ ) | Plasma | 1.378 | 0.876 | 3.89 (3.10–5.10) | 3.15 (2.09–3.48) | 3.24 (1.53–3.76)  | 0.175 | 0.217            |
| Inositol-6TMS ( $\times 10^{-1}$ )            | Plasma | 1.335 | 0.329 | 1.31 (0.99–1.75) | 1.55 (1.20–2.16) | 1.31 (1.07–1.66)  | 0.235 | 0.984            |
| Isocitric acid-4TMS ( $\times 10^{-2}$ )      | Plasma | 1.284 | 1.678 | 1.89 (1.62–2.13) | 2.18 (2.00–2.77) | 2.58 (2.18–3.09)  | 0.127 | <b>0.018</b>     |
| Isoleucine-2TMS                               | Plasma | 1.127 | 0.189 | 3.39 (2.38–3.53) | 2.87 (1.36–3.68) | 2.82 (1.40–4.04)  | 0.606 | 0.637            |
| Kynurenine-3TMS ( $\times 10^{-3}$ )          | Plasma | 0.464 | 0.765 | 0 (0–5.36)       | 0 (0–1.98)       | 0 (0–8.55)        | 0.870 | 0.862            |
| Lactic acid-2TMS                              | Plasma | 1.725 | 1.519 | 6.28 (5.63–7.71) | 7.86 (6.44–9.34) | 8.11 (6.87–13.99) | 0.079 | <b>0.045</b>     |
| Lactose-meto-8TMS                             | Plasma | 0     | 0.6   | 0 (0–0)          | 0 (0–0)          | 0 (0–0)           | 0.999 | 0.706            |
| Lauric acid-TMS ( $\times 10^{-1}$ )          | Plasma | 0.307 | 1.069 | 0.99 (0.89–1.03) | 0.84 (0.71–1.02) | 0.79 (0.64–1.11)  | 0.287 | 0.319            |
| Leucine-2TMS                                  | Plasma | 1.48  | 0.393 | 6.85 (4.59–7.24) | 5.66 (2.70–6.28) | 5.10 (2.61–6.67)  | 0.157 | 0.264            |
| Linoleic acid-TMS ( $\times 10^{-1}$ )        | Plasma | 0.63  | 0.862 | 1.44 (1.11–1.68) | 1.53 (1.19–1.91) | 1.54 (1.34–1.99)  | 0.86  | 0.598            |
| Lysine-4TMS                                   | Plasma | 1.499 | 0.256 | 0.59 (0.51–0.97) | 0.53 (0.30–0.77) | 0.64 (0.37–1.02)  | 0.283 | 0.895            |
| Lyxose-meto-4TMS                              | Plasma | 0.704 | 0     | 0 (0–0)          | 0 (0–0)          | 0 (0–0)           | 0.719 | 0.999            |
| Maleic acid-2TMS                              | Plasma | 1.041 | 1.142 | 0 (0–0)          | 0 (0–0)          | 0 (0–0)           | 0.947 | 0.999            |
| Malic acid-3TMS ( $\times 10^{-3}$ )          | Plasma | 1.506 | 1.451 | 4.62 (0–5.33)    | 0 (0–6.45)       | 6.46 (4.25–7.93)  | 0.855 | 0.061            |
| Mannitol-6TMS                                 | Plasma | 1.776 | 1.294 | 0.94 (0.78–1.03) | 1.14 (0.97–1.35) | 1.01 (0.88–1.31)  | 0.036 | 0.24             |
| Mannose-meto-5TMS ( $\times 10^{-1}$ )        | Plasma | 1.523 | 1.18  | 0.93 (0.85–1.37) | 1.33 (1.06–1.59) | 1.19 (0.92–1.62)  | 0.127 | 0.38             |
| Margaric acid-TMS ( $\times 10^{-2}$ )        | Plasma | 0.728 | 0.446 | 4.39 (3.78–5.08) | 4.01 (3.36–4.95) | 4.04 (3.60–4.86)  | 0.682 | 0.716            |
| meso-Erythritol-4TMS ( $\times 10^{-3}$ )     | Plasma | 1.157 | 0.821 | 0 (0–0)          | 0 (0–2.38)       | 0 (0–0)           | 0.216 | 0.463            |
| Methionine-2TMS ( $\times 10^{-2}$ )          | Plasma | 1.127 | 0.384 | 2.39 (0–3.73)    | 0 (0–2.46)       | 0 (0–2.80)        | 0.544 | 0.67             |
| Myristic acid-TMS ( $\times 10^{-1}$ )        | Plasma | 0.973 | 0.715 | 1.70 (1.44–1.85) | 1.50 (1.20–1.87) | 1.48 (1.14–1.75)  | 0.428 | 0.348            |
| N6-Acetyllysine-2TMS                          | Plasma | 0.69  | 0     | 0 (0–0)          | 0 (0–0)          | 0 (0–0)           | 0.719 | 0.999            |
| N-Acetylglutamine-3TMS                        | Plasma | 0.805 | 1.018 | 0 (0–0)          | 0 (0–0)          | 0 (0–0)           | 0.719 | 0.304            |
| Niacinamide-TMS                               | Plasma | 0     | 0.682 | 0 (0–0)          | 0 (0–0)          | 0 (0–0)           | 0.999 | 0.706            |
| Nicotinic acid-TMS                            | Plasma | 1.298 | 0.37  | 0 (0–0)          | 0 (0–0)          | 0 (0–0)           | 0.309 | 0.878            |
| Nonanoic acid-TMS ( $\times 10^{-1}$ )        | Plasma | 1.669 | 3.1   | 6.84 (6.27–7.29) | 4.62 (3.21–7.16) | 2.96 (2.56–3.31)  | 0.193 | <b>&lt;0.001</b> |
| Octadecanol-TMS ( $\times 10^{-2}$ )          | Plasma | 1.182 | 0.986 | 7.53 (7.22–8.30) | 8.37 (6.88–9.44) | 8.04 (6.93–9.20)  | 0.235 | 0.598            |
| Octanoic acid-TMS ( $\times 10^{-2}$ )        | Plasma | 0.227 | 1.27  | 6.29 (5.78–6.65) | 6.35 (5.58–6.67) | 5.33 (3.86–6.25)  | 0.999 | 0.099            |
| Oleamide-TMS ( $\times 10^{-1}$ )             | Plasma | 0.597 | 1.177 | 2.74 (2.08–3.88) | 2.78 (2.32–5.09) | 2.53 (2.02–3.24)  | 0.86  | 0.558            |

|                                                 |        |       |       |                   |                  |                  |              |              |
|-------------------------------------------------|--------|-------|-------|-------------------|------------------|------------------|--------------|--------------|
| Oleic acid-TMS ( $\times 10^{-1}$ )             | Plasma | 0.64  | 1.336 | 4.17 (3.06–5.09)  | 3.92 (3.53–5.55) | 5.18 (4.04–6.70) | 0.793        | 0.217        |
| O-Phosphoethanolamine-3TMS ( $\times 10^{-3}$ ) | Plasma | 1.267 | 0.715 | 0 (0–0)           | 0 (0–0)          | 0 (0–8.82)       | 0.309        | 0.513        |
| Ornithine-4TMS                                  | Plasma | 1.055 | 0.188 | 1.61 (0.75–1.85)  | 1.33 (0.51–1.70) | 1.33 (0.55–2.13) | 0.606        | 0.923        |
| Oxalic acid-2TMS                                | Plasma | 0.574 | 1.433 | 3.94 (3.60–4.11)  | 3.81 (3.33–4.12) | 3.14 (2.80–3.79) | 0.942        | 0.087        |
| Palmitic acid-TMS                               | Plasma | 0.839 | 0.625 | 5.32 (4.38–5.64)  | 4.08 (4.00–5.48) | 4.64 (3.93–5.70) | 0.606        | 0.867        |
| Palmitoleic acid-TMS ( $\times 10^{-2}$ )       | Plasma | 0.943 | 1.508 | 2.55 (2.05–4.64)  | 3.88 (2.52–5.64) | 4.92 (3.37–7.35) | 0.462        | 0.077        |
| ParaXanthine-TMS                                | Plasma | 0     | 0.821 | 0 (0–0)           | 0 (0–0)          | 0 (0–0)          | 0.999        | 0.463        |
| Phenylacetic acid-TMS                           | Plasma | 0.789 | 1.106 | 0 (0–0)           | 0 (0–0)          | 0 (0–0)          | 0.719        | 0.304        |
| Phenylalanine-2TMS                              | Plasma | 1.125 | 0.516 | 1.75 (0.09–2.57)  | 0.11 (0.06–2.25) | 0.47 (0.07–2.32) | 0.428        | 0.793        |
| Phosphoric acid-3TMS                            | Plasma | 1.712 | 1.774 | 23.9 (20.6–27.6)  | 20.3 (19.7–24.4) | 19.9 (17.2–22.0) | 0.141        | 0.039        |
| Proline-2TMS                                    | Plasma | 1.074 | 0.455 | 2.64 (1.92–4.42)  | 2.07 (1.22–3.34) | 1.73 (1.14–5.40) | 0.235        | 0.637        |
| Psicose-meto-5TMS ( $\times 10^{-2}$ )          | Plasma | 1.105 | 1.614 | 3.16 (1.79–5.00)  | 2.09 (0.36–4.23) | 1.72 (1.25–2.36) | 0.365        | 0.087        |
| Putrescine-4TMS ( $\times 10^{-2}$ )            | Plasma | 0.994 | 0.419 | 0 (0–1.71)        | 1.48 (0–1.72)    | 0 (0–1.44)       | 0.842        | 0.979        |
| Pyrogallol-3TMS ( $\times 10^{-3}$ )            | Plasma | 1.69  | 1.507 | 0 (0–5.30)        | 0 (0–0)          | 0 (0–0)          | 0.093        | 0.106        |
| Pyruvic acid-meto-TMS                           | Plasma | 1.036 | 1.919 | 0.60 (0.54–0.67)  | 0.66 (0.46–0.80) | 0.79 (0.61–1.03) | 0.462        | <b>0.021</b> |
| Ribitol-5TMS ( $\times 10^{-3}$ )               | Plasma | 0.817 | 0.677 | 0 (0–6.82)        | 4.87 (0–8.59)    | 6.31 (0–9.96)    | 0.325        | 0.33         |
| Ribonic acid-5TMS ( $\times 10^{-2}$ )          | Plasma | 0.671 | 0.652 | 0 (0–2.04)        | 2.06 (0–2.75)    | 2.23 (0.34–2.85) | 0.446        | 0.25         |
| Serine-3TMS ( $\times 10^{-1}$ )                | Plasma | 1.531 | 0.836 | 9.76 (4.59–11.24) | 4.24 (1.81–9.10) | 4.11 (1.65–9.03) | 0.175        | 0.24         |
| Sorbitol-6TMS ( $\times 10^{-1}$ )              | Plasma | 0.936 | 1.938 | 1.95 (0.81–2.40)  | 1.78 (1.08–2.09) | 1.13 (0.79–1.37) | 0.942        | 0.195        |
| Sorbose-meto-5TMS ( $\times 10^{-2}$ )          | Plasma | 0.976 | 1.771 | 2.14 (0.61–4.31)  | 1.33 (0–2.15)    | 0 (0–1.69)       | 0.377        | <b>0.025</b> |
| Stearic acid-TMS                                | Plasma | 1.074 | 0.173 | 3.70 (3.34–4.06)  | 3.07 (2.86–3.87) | 3.30 (2.86–3.70) | 0.283        | 0.319        |
| Succinic acid-2TMS ( $\times 10^{-1}$ )         | Plasma | 0.554 | 0.963 | 0.86 (0.83–0.97)  | 0.94 (0.81–1.07) | 0.85 (0.70–0.92) | 0.827        | 0.38         |
| Sucrose-8TMS ( $\times 10^{-2}$ )               | Plasma | 1.934 | 1.319 | 1.69 (0–6.92)     | 0 (0–0.32)       | 0 (0–1.14)       | <b>0.044</b> | 0.194        |
| Tagatose-meto-5TMS ( $\times 10^{-2}$ )         | Plasma | 1.004 | 1.557 | 2.12 (0–5.66)     | 1.39 (0.35–2.26) | 0 (0–1.45)       | 0.563        | 0.173        |
| Tartaric acid-4TMS ( $\times 10^{-3}$ )         | Plasma | 1.141 | 0.814 | 0 (0–0)           | 0 (0–2.76)       | 0 (0–0)          | 0.216        | 0.463        |
| Taurine-3TMS ( $\times 10^{-2}$ )               | Plasma | 1.232 | 0.819 | 1.16 (0.50–2.54)  | 0.98 (0–1.79)    | 1.88 (1.04–3.42) | 0.671        | 0.412        |
| Threitol-4TMS                                   | Plasma | 0.789 | 0.646 | 0 (0–0)           | 0 (0–0)          | 0 (0–0)          | 0.719        | 0.706        |
| Threonic acid-4TMS ( $\times 10^{-2}$ )         | Plasma | 0.744 | 0.45  | 3.63 (2.60–4.46)  | 4.06 (3.06–4.76) | 2.99 (2.31–4.30) | 0.682        | 0.755        |
| Threonine-3TMS ( $\times 10^{-1}$ )             | Plasma | 1.05  | 0.576 | 6.18 (3.43–6.73)  | 3.42 (1.40–6.35) | 2.99 (1.34–7.37) | 0.366        | 0.38         |

|                                                          |                |       |       |                    |                    |                   |                  |              |
|----------------------------------------------------------|----------------|-------|-------|--------------------|--------------------|-------------------|------------------|--------------|
| Triethanolamine-3TMS ( $\times 10^{-2}$ )                | Plasma         | 0.916 | 0.879 | 1.58 (1.10–2.90)   | 1.66 (1.46–2.24)   | 1.51 (0.96–1.89)  | 0.942            | 0.598        |
| Tryptophan-3TMS                                          | Plasma         | 1.3   | 1.564 | 1.58 (1.19–2.20)   | 1.26 (0.85–1.74)   | 1.10 (0.81–1.57)  | 0.235            | 0.087        |
| Tyramine-3TMS                                            | Plasma         | 1.522 | 0.234 | 1.27 (0.97–1.91)   | 1.10 (0.62–1.47)   | 1.29 (0.72–1.95)  | 0.337            | 0.923        |
| Tyrosine-3TMS                                            | Plasma         | 1.044 | 0.274 | 3.44 (2.98–4.46)   | 2.74 (2.22–4.33)   | 3.25 (2.14–5.08)  | 0.682            | 0.83         |
| Urea-2TMS                                                | Plasma         | 0.63  | 0.246 | 10.81 (8.43–11.52) | 8.95 (8.28–12.27)  | 8.90 (6.87–13.30) | 0.756            | 0.677        |
| Uric acid-4TMS                                           | Plasma         | 0.888 | 2.221 | 1.46 (1.39–1.78)   | 1.53 (1.38–1.56)   | 1.92 (1.81–2.32)  | 0.942            | <b>0.009</b> |
| Valine-2TMS                                              | Plasma         | 1.316 | 0.688 | 15.5 (13.6–16.6)   | 13.8 (10.9–15.7)   | 12.1 (9.9–17.4)   | 0.309            | 0.348        |
| Xanthine-3TMS                                            | Plasma         | 1.047 | 0     | 0 (0–0)            | 0 (0–0)            | 0 (0–0)           | 0.719            | 0.999        |
| Xylitol-5TMS                                             | Plasma         | 1.047 | 0     | 0 (0–0)            | 0 (0–0)            | 0 (0–0)           | 0.719            | 0.999        |
| Xylose-meto-4TMS                                         | Plasma         | 0.898 | 0     | 0 (0–0)            | 0 (0–0)            | 0 (0–0)           | 0.483            | 0.999        |
| <b>2-Isopropylmalic acid-3TMS</b>                        | <b>Urinary</b> |       |       | <b>1</b>           | <b>1</b>           | <b>1</b>          | <b>Reference</b> |              |
| 1,6-Anhydroglucose-3TMS ( $\times 10^{-1}$ )             | Urinary        | 0.476 | 0.681 | 2.17 (0.59–5.83)   | 3.46 (2.14–4.18)   | 2.27 (1.05–3.07)  | 0.681            | 0.829        |
| 1-Hexadecanol-TMS ( $\times 10^{-1}$ )                   | Urinary        | 0.502 | 1.496 | 1.93 (1.56–2.27)   | 1.89 (1.61–2.39)   | 1.56 (1.33–1.87)  | 0.999            | 0.111        |
| 2-Aminobutyric acid-2TMS ( $\times 10^{-2}$ )            | Urinary        | 1.073 | 0.621 | 1.28 (1.13–1.59)   | 1.32 (0.69–2.79)   | 0.95 (0.46–1.60)  | 0.999            | 0.157        |
| 2-Aminoethanol-3TMS                                      | Urinary        | 0.658 | 0.973 | 14.79 (8.73–20.02) | 11.55 (9.36–17.01) | 9.59 (5.35–18.19) | 0.89             | 0.598        |
| 2-Aminopimelic acid-3TMS                                 | Urinary        | 0.67  | 0.934 | 10.16 (5.04–15.38) | 10.02 (7.29–14.78) | 7.78 (5.53–9.33)  | 0.99             | 0.677        |
| 2-Hydroxybutyric acid-2TMS                               | Urinary        | 1.047 | 0.721 | 0 (0–0)            | 0 (0–0)            | 0 (0–0)           | 0.719            | 0.463        |
| 2-Hydroxyglutaric acid-3TMS ( $\times 10^{-1}$ )         | Urinary        | 0.531 | 0.65  | 5.90 (1.94–8.78)   | 4.30 (3.31–9.28)   | 4.57 (2.87–7.35)  | 0.998            | 0.793        |
| 2-Hydroxyhippuric acid-2TMS ( $\times 10^{-2}$ )         | Urinary        | 0.344 | 0.75  | 4.72 (1.98–11.03)  | 3.42 (1.60–6.32)   | 2.68 (1.29–25.35) | 0.625            | 0.676        |
| 2-Hydroxyisobutyric acid-2TMS ( $\times 10^{-1}$ )       | Urinary        | 0.98  | 0.574 | 1.28 (0.67–2.07)   | 1.08 (0.86–1.62)   | 1.41 (0.93–2.27)  | 0.942            | 0.793        |
| 2-Hydroxyisovaleric acid-2TMS                            | Urinary        | 1.109 | 0.955 | 0 (0–0)            | 0 (0–0)            | 0 (0–0)           | 0.483            | 0.304        |
| 2-Ketoadipic acid-oxime-3TMS                             | Urinary        | 1.047 | 0.598 | 0 (0–0)            | 0 (0–0)            | 0 (0–0)           | 0.719            | 0.706        |
| 2-Ketobutyric acid-meto-TMS ( $\times 10^{-2}$ )         | Urinary        | 1.321 | 1.059 | 1.38 (1.13–1.79)   | 1.64 (1.27–1.96)   | 1.60 (1.30–1.88)  | 0.309            | 0.413        |
| 2-Ketoglutaric acid-meto-2TMS                            | Urinary        | 0.675 | 0.627 | 1.17 (0.29–1.54)   | 0.97 (0.58–1.30)   | 0.77 (0.56–1.02)  | 0.918            | 0.923        |
| 2-Ketoisocaproic acid-meto-TMS ( $\times 10^{-3}$ )      | Urinary        | 0.438 | 0.607 | 6.61 (0–9.61)      | 0 (0–12.93)        | 0 (0–8.77)        | 0.989            | 0.67         |
| 2-Keto-isovaleric acid-meto-TMS                          | Urinary        | 1.065 | 0.803 | 0 (0–0)            | 0 (0–0)            | 0 (0–0)           | 0.483            | 0.706        |
| 2-Methyl-3-hydroxybutyric acid-2TMS ( $\times 10^{-3}$ ) | Urinary        | 0.728 | 1.103 | 0 (0–0)            | 0 (0–0)            | 0 (0–7.75)        | 0.947            | 0.295        |
| 2-Phosphoglyceric acid -4TMS ( $\times 10^{-3}$ )        | Urinary        | 1.568 | 0.981 | 0 (0–6.60)         | 0 (0–0)            | 0 (0–0)           | 0.254            | 0.419        |
| 3-Aminoglutaric acid-2TMS ( $\times 10^{-2}$ )           | Urinary        | 1.07  | 1.89  | 7.64 (5.35–10.38)  | 5.41 (4.08–10.96)  | 3.33 (2.45–6.01)  | 0.682            | <b>0.039</b> |
| 3-Aminoisobutyric acid-3TMS ( $\times 10^{-1}$ )         | Urinary        | 0.818 | 0.552 | 1.31 (0.79–15.74)  | 5.20 (0.86–16.84)  | 1.18 (0.49–6.01)  | 0.756            | 0.716        |

|                                                           |         |       |       |                    |                   |                   |              |              |
|-----------------------------------------------------------|---------|-------|-------|--------------------|-------------------|-------------------|--------------|--------------|
| 3-Aminopropanoic acid-3TMS ( $\times 10^{-1}$ )           | Urinary | 1.052 | 0.977 | 0.80 (0.32–1.18)   | 1.17 (0.36–3.20)  | 0.82 (0.54–2.34)  | 0.606        | 0.793        |
| 3-Hydroxy-3-methylglutaric acid-3TMS ( $\times 10^{-2}$ ) | Urinary | 0.713 | 0.826 | 6.68 (2.04–7.69)   | 4.60 (3.56–7.49)  | 5.29 (4.66–7.20)  | 0.998        | 0.948        |
| 3-Hydroxyanthranilic acid-3TMS ( $\times 10^{-3}$ )       | Urinary | 0.795 | 0.917 | 0 (0–2.72)         | 0 (0–4.98)        | 0 (0–1.36)        | 0.948        | 0.443        |
| 3-Hydroxybutyric acid-2TMS ( $\times 10^{-1}$ )           | Urinary | 1.254 | 1.403 | 1.75 (1.35–2.15)   | 1.98 (1.61–2.36)  | 2.06 (1.64–2.57)  | 0.309        | 0.141        |
| 3-Hydroxyglutaric acid-3TMS ( $\times 10^{-1}$ )          | Urinary | 0.605 | 1.347 | 8.12 (7.93–8.23)   | 8.22 (7.55–8.50)  | 7.68 (7.43–8.01)  | 0.999        | <b>0.045</b> |
| 3-Hydroxyisobutyric acid-2TMS ( $\times 10^{-1}$ )        | Urinary | 0.687 | 0.961 | 1.79 (1.01–2.05)   | 1.38 (1.21–1.89)  | 1.76 (1.26–2.99)  | 0.99         | 0.637        |
| 3-Hydroxyisovaleric acid-2TMS ( $\times 10^{-1}$ )        | Urinary | 0.834 | 0.94  | 4.64 (2.80–5.33)   | 4.02 (3.05–6.59)  | 4.14 (3.25–7.86)  | 0.942        | 0.83         |
| 3-Hydroxyphenylacetic acid-2TMS ( $\times 10^{-2}$ )      | Urinary | 0.961 | 0.168 | 0 (0–1.15)         | 0 (0–0.71)        | 0 (0–1.65)        | 0.72         | 0.979        |
| 3-Hydroxypropionic acid-2TMS ( $\times 10^{-1}$ )         | Urinary | 0.443 | 0.58  | 1.31 (0.77–2.25)   | 1.10 (0.88–1.97)  | 1.30 (0.85–1.81)  | 0.99         | 0.968        |
| 3-Methoxy-4-hydroxybenzoic acid-2TMS ( $\times 10^{-2}$ ) | Urinary | 1.731 | 1.065 | 0.77 (0–1.08)      | 1.57 (0.69–2.37)  | 0.94 (0–1.84)     | <b>0.049</b> | 0.665        |
| 3-Methyl-2-oxovaleric acid-meto-TMS ( $\times 10^{-2}$ )  | Urinary | 0.699 | 0.92  | 0.88 (0.64–1.70)   | 1.47 (0–2.10)     | 1.53 (0.86–2.11)  | 0.874        | 0.637        |
| 3-Methyladipic acid-2TMS ( $\times 10^{-2}$ )             | Urinary | 0.86  | 0.989 | 0 (0–3.04)         | 2.82 (0.86–5.13)  | 3.00 (0–8.24)     | 0.245        | 0.503        |
| 3-Methylglutaric acid-2TMS ( $\times 10^{-2}$ )           | Urinary | 0.5   | 0.661 | 1.48 (1.15–2.23)   | 1.55 (0.47–2.89)  | 1.82 (0.29–3.07)  | 0.99         | 0.947        |
| 3-Phenyllactic acid-2TMS ( $\times 10^{-2}$ )             | Urinary | 1.038 | 0.989 | 0 (0–0.56)         | 0 (0–2.10)        | 1.04 (0–1.51)     | 0.627        | 0.184        |
| 3-Phosphoglyceric acid-4TMS ( $\times 10^{-3}$ )          | Urinary | 1.476 | 0.906 | 7.35 (0–18.50)     | 0 (0–9.49)        | 3.24 (0–22.85)    | 0.407        | 0.731        |
| 3-Sulfinioalanine-3TMS ( $\times 10^{-3}$ )               | Urinary | 0.971 | 0.653 | 0 (0–4.51)         | 0 (0–3.98)        | 0 (0–0)           | 0.728        | 0.432        |
| 4-Aminobutyric acid-3TMS ( $\times 10^{-2}$ )             | Urinary | 1.198 | 1.854 | 7.35 (3.82–9.97)   | 4.27 (0.81–6.99)  | 1.80 (0–5.99)     | 0.307        | 0.051        |
| 4-Hydroxybenzoic acid-2TMS ( $\times 10^{-2}$ )           | Urinary | 0.822 | 0.523 | 2.70 (1.72–3.99)   | 3.29 (2.09–4.43)  | 2.95 (1.25–3.52)  | 0.682        | 0.83         |
| 4-Hydroxyphenylacetic acid-2TMS ( $\times 10^{-1}$ )      | Urinary | 0.99  | 0.382 | 0.93 (0.29–1.51)   | 1.10 (0.51–2.92)  | 0.61 (0.34–1.37)  | 0.497        | 0.978        |
| 4-Hydroxyphenyllactic acid-3TMS ( $\times 10^{-1}$ )      | Urinary | 0.554 | 0.636 | 1.32 (0.41–1.78)   | 1.23 (0.87–1.86)  | 1.91 (0.68–2.79)  | 0.942        | 0.558        |
| 4-Hydroxyproline-3TMS ( $\times 10^{-2}$ )                | Urinary | 0.772 | 0.514 | 0 (0–9.19)         | 0 (0–5.17)        | 0 (0–5.39)        | 0.988        | 0.992        |
| 5-Aminolevulinic acid-meto-3TMS ( $\times 10^{-2}$ )      | Urinary | 0.783 | 1.713 | 1.72 (1.14–2.39)   | 1.39 (1.03–1.92)  | 0.86 (0–1.29)     | 0.701        | <b>0.044</b> |
| 5-Aminovaleric acid-3TMS ( $\times 10^{-1}$ )             | Urinary | 0.441 | 1.095 | 0.76 (0.52–1.33)   | 0.87 (0.66–1.48)  | 0.59 (0.35–1.02)  | 0.918        | 0.38         |
| 5-Hydroxymethyl-2-furoic acid-2TMS ( $\times 10^{-1}$ )   | Urinary | 1.157 | 0.402 | 1.84 (0.42–2.66)   | 1.68 (0.56–3.54)  | 0.89 (0.71–1.66)  | 0.89         | 0.637        |
| 5-Oxoproline-2TMS                                         | Urinary | 0.813 | 0.534 | 10.09 (6.18–11.52) | 8.51 (7.41–12.13) | 8.44 (7.47–10.96) | 0.918        | 0.948        |
| 7-Methylguanine-2TMS ( $\times 10^{-1}$ )                 | Urinary | 1.088 | 0.893 | 4.00 (2.32–8.43)   | 3.71 (2.37–5.69)  | 2.44 (1.86–4.27)  | 0.569        | 0.319        |
| Acetoacetic acid-meto-TMS                                 | Urinary | 0     | 0.803 | 0 (0–0)            | 0 (0–0)           | 0 (0–0)           | 0.999        | 0.706        |
| Acetylglycine-TMS                                         | Urinary | 1.011 | 0.598 | 0 (0–0)            | 0 (0–0)           | 0 (0–0)           | 0.483        | 0.706        |
| Aconitic acid-3TMS                                        | Urinary | 0.62  | 1.08  | 2.63 (0.89–2.92)   | 1.97 (1.06–3.05)  | 1.20 (0.91–2.04)  | 0.99         | 0.319        |

|                                                           |         |       |       |                    |                     |                    |       |              |
|-----------------------------------------------------------|---------|-------|-------|--------------------|---------------------|--------------------|-------|--------------|
| Adenine-2TMS ( $\times 10^{-1}$ )                         | Urinary | 1.266 | 1.353 | 1.72 (1.17–4.07)   | 1.63 (1.31–2.42)    | 1.54 (1.04–2.04)   | 0.86  | 0.413        |
| Adenosine-4TMS ( $\times 10^{-1}$ )                       | Urinary | 1.109 | 1.77  | 1.31 (0.78–2.39)   | 1.00 (0.73–1.64)    | 0.71 (0.50–0.97)   | 0.569 | 0.077        |
| Adipic acid-2TMS ( $\times 10^{-2}$ )                     | Urinary | 0.466 | 1.104 | 1.32 (0.78–1.97)   | 1.60 (1.05–2.68)    | 2.44 (1.18–4.75)   | 0.606 | 0.157        |
| Alanine-2TMS                                              | Urinary | 0.942 | 0.946 | 12.72 (8.70–13.82) | 12.08 (6.50–21.25)  | 9.17 (5.82–12.13)  | 0.99  | 0.38         |
| Allantoin-3TMS ( $\times 10^{-2}$ )                       | Urinary | 0.753 | 0.786 | 4.74 (0.84–1.11)   | 4.35 (2.94–7.77)    | 3.39 (0.22–9.52)   | 0.962 | 0.894        |
| Allose-meto-5TMS ( $\times 10^{-2}$ )                     | Urinary | 1.108 | 1.369 | 7.43 (4.22–24.13)  | 6.72 (5.22–10.85)   | 6.60 (3.89–8.29)   | 0.719 | 0.483        |
| Arabinose-meto-4TMS ( $\times 10^{-1}$ )                  | Urinary | 0.483 | 1.037 | 3.98 (2.15–6.26)   | 4.12 (2.37–5.41)    | 2.83 (2.35–3.44)   | 0.999 | 0.264        |
| Arabitol-5TMS ( $\times 10^{-1}$ )                        | Urinary | 0.832 | 0.603 | 8.37 (4.25–8.74)   | 6.59 (4.37–11.06)   | 5.70 (4.07–10.02)  | 0.998 | 0.968        |
| Arachidonic acid-TMS                                      | Urinary | 0     | 0.671 | 0 (0–0)            | 0 (0–0)             | 0 (0–0)            | 0.999 | 0.706        |
| Arginine-3TMS ( $\times 10^{-1}$ )                        | Urinary | 0.817 | 1.223 | 1.51 (1.14–2.33)   | 1.15 (0.60–2.11)    | 0.54 (0.17–1.43)   | 0.644 | 0.111        |
| Ascorbic acid-4TMS                                        | Urinary | 0.979 | 1.068 | 0 (0–0)            | 0 (0–0)             | 0 (0–0)            | 0.808 | 0.331        |
| Asparagine-3TMS ( $\times 10^{-1}$ )                      | Urinary | 0.815 | 0.786 | 1.14 (0–3.21)      | 1.38 (0.83–3.82)    | 1.21 (0.74–2.87)   | 0.363 | 0.696        |
| Aspartic acid-3TMS ( $\times 10^{-2}$ )                   | Urinary | 1.024 | 1.876 | 6.32 (4.82–9.39)   | 5.98 (2.58–10.06)   | 3.05 (1.59–5.05)   | 0.793 | <b>0.045</b> |
| Azelaic acid-2TMS ( $\times 10^{-2}$ )                    | Urinary | 1.078 | 0.823 | 0 (0–0.36)         | 1.14 (0–4.30)       | 1.52 (0–2.72)      | 0.067 | 0.106        |
| Benzoic acid-TMS ( $\times 10^{-1}$ )                     | Urinary | 0.259 | 0.492 | 4.45 (3.68–4.80)   | 4.17 (3.19–4.89)    | 4.88 (3.62–5.27)   | 0.918 | 0.38         |
| Caproic acid-TMS ( $\times 10^{-1}$ )                     | Urinary | 0.306 | 0.393 | 1.13 (0.93–1.33)   | 1.17 (0.93–1.30)    | 1.07 (0.99–1.21)   | 0.99  | 0.984        |
| Catechol-2TMS ( $\times 10^{-2}$ )                        | Urinary | 0.473 | 0.72  | 3.18 (2.16–8.76)   | 2.95 (1.53–6.34)    | 2.03 (0.91–5.17)   | 0.86  | 0.539        |
| Cholesterol-TMS                                           | Urinary | 0.69  | 0     | 0 (0–0)            | 0 (0–0)             | 0 (0–0)            | 0.999 | 0.719        |
| Citramalic acid-3TMS ( $\times 10^{-1}$ )                 | Urinary | 1.338 | 0.617 | 3.88 (2.20–9.98)   | 3.95 (2.37–4.73)    | 3.92 (3.26–6.29)   | 0.682 | 0.999        |
| Citric acid-4TMS                                          | Urinary | 0.652 | 0.929 | 14.94 (7.67–23.22) | 15.10 (10.59–21.93) | 12.17 (8.30–13.93) | 0.979 | 0.637        |
| Creatinine-3TMS                                           | Urinary | 1.649 | 1.797 | 1.02 (0.53–2.00)   | 0.64 (0.40–1.11)    | 0.57 (0.37–0.80)   | 0.175 | 0.125        |
| Cystathionine-4TMS ( $\times 10^{-2}$ )                   | Urinary | 1.224 | 0.404 | 0 (0–0.94)         | 1.07 (0–2.15)       | 0 (0–1.55)         | 0.154 | 0.957        |
| Cysteine-3TMS ( $\times 10^{-1}$ )                        | Urinary | 0.7   | 0.827 | 2.75 (1.64–4.74)   | 2.42 (1.56–3.93)    | 1.67 (0.83–2.56)   | 0.793 | 0.195        |
| Cystine-4TMS ( $\times 10^{-2}$ )                         | Urinary | 0.498 | 0.694 | 3.64 (3.04–4.43)   | 4.62 (1.39–8.38)    | 1.96 (0–4.66)      | 0.86  | 0.097        |
| Cytosine-2TMS ( $\times 10^{-1}$ )                        | Urinary | 0.688 | 1.323 | 1.79 (0.66–2.67)   | 1.61 (1.07–2.26)    | 1.24 (0.92–1.61)   | 0.979 | 0.447        |
| Decanoic acid-TMS ( $\times 10^{-2}$ )                    | Urinary | 0.646 | 0.893 | 5.98 (4.55–7.39)   | 5.47 (4.59–6.66)    | 5.17 (4.63–6.41)   | 0.827 | 0.637        |
| Dihydroxyacetone phosphate-meto-3TMS ( $\times 10^{-1}$ ) | Urinary | 0.678 | 0.632 | 1.52 (0.63–1.94)   | 1.14 (0.51–1.88)    | 0.97 (0.60–1.46)   | 0.89  | 0.38         |
| Docosahexaenoic acid-TMS ( $\times 10^{-2}$ )             | Urinary | 0.737 | 0.303 | 0 (0–1.40)         | 0 (0–1.24)          | 0 (0–1.10)         | 0.994 | 0.934        |
| Elaidic acid-TMS ( $\times 10^{-1}$ )                     | Urinary | 0.781 | 0.353 | 0.94 (0.87–1.20)   | 0.83 (0.54–1.76)    | 0.90 (0.60–1.49)   | 0.644 | 0.716        |

|                                                |         |       |       |                     |                    |                   |       |              |
|------------------------------------------------|---------|-------|-------|---------------------|--------------------|-------------------|-------|--------------|
| Ethylmalonic acid-2TMS ( $\times 10^{-1}$ )    | Urinary | 0.551 | 0.661 | 0.96 (0.46–1.11)    | 0.82 (0.52–1.19)   | 0.81 (0.51–1.29)  | 0.962 | 0.994        |
| Fructose-meto-5TMS ( $\times 10^{-2}$ )        | Urinary | 0.673 | 1.531 | 7.50 (1.47–15.30)   | 4.01 (2.05–8.43)   | 3.54 (1.69–6.46)  | 0.644 | 0.348        |
| Fucose-meto-4TMS ( $\times 10^{-2}$ )          | Urinary | 1.074 | 0.613 | 0 (0–1.89)          | 1.44 (0–1.68)      | 0 (0–1.09)        | 0.5   | 0.882        |
| Fumaric acid-2TMS ( $\times 10^{-2}$ )         | Urinary | 1.443 | 0.966 | 5.23 (3.05–5.98)    | 6.81 (4.52–8.85)   | 6.48 (4.07–7.44)  | 0.235 | 0.319        |
| Galactitol-6TMS ( $\times 10^{-1}$ )           | Urinary | 1.487 | 1.37  | 1.64 (1.15–4.71)    | 1.43 (0.75–2.51)   | 1.13 (0.77–2.05)  | 0.532 | 0.319        |
| Galacturonic acid-meto-5TMS                    | Urinary | 0.493 | 0.625 | 1.56 (0.74–2.55)    | 1.24 (1.05–2.06)   | 1.07 (0.72–1.59)  | 0.979 | 0.447        |
| Glucaric acid-6TMS                             | Urinary | 0.845 | 0.582 | 1.45 (0.86–2.13)    | 1.16 (0.90–1.58)   | 1.04 (0.77–1.34)  | 0.827 | 0.413        |
| Gluconic acid-6TMS                             | Urinary | 1.3   | 1.557 | 5.08 (1.93–5.51)    | 2.82 (1.75–4.00)   | 2.68 (2.00–3.66)  | 0.337 | 0.195        |
| Glucosamine-5TMS ( $\times 10^{-1}$ )          | Urinary | 0.564 | 0.878 | 5.78 (3.13–6.95)    | 3.59 (3.19–7.12)   | 2.67 (1.38–5.82)  | 0.99  | 0.125        |
| Glucose 6-phosphate-meto-6TMS                  | Urinary | 0     | 0.803 | 0 (0–0)             | 0 (0–0)            | 0 (0–0)           | 0.999 | 0.706        |
| Glucose-meto-5TMS ( $\times 10^{-1}$ )         | Urinary | 0.681 | 0.491 | 5.20 (2.60–8.50)    | 4.83 (3.32–9.02)   | 3.83 (2.97–6.40)  | 0.942 | 0.895        |
| Glucuronic acid-meto-5TMS                      | Urinary | 0.696 | 0.6   | 3.83 (1.57–5.51)    | 3.35 (2.27–5.06)   | 3.12 (1.77–3.92)  | 0.99  | 0.793        |
| Glutamic acid-3TMS ( $\times 10^{-1}$ )        | Urinary | 0.92  | 1.273 | 2.72 (1.44–3.29)    | 1.88 (1.61–2.70)   | 1.50 (1.17–2.55)  | 0.719 | 0.195        |
| Glutamine-3TMS ( $\times 10^{-1}$ )            | Urinary | 0.765 | 0.948 | 3.65 (2.60–6.14)    | 2.52 (1.82–5.40)   | 1.46 (0.85–4.98)  | 0.756 | 0.176        |
| Glyceric acid-3TMS ( $\times 10^{-1}$ )        | Urinary | 0.809 | 0.84  | 1.50 (0.82–1.89)    | 1.93 (1.11–2.17)   | 1.84 (0.93–3.00)  | 0.396 | 0.52         |
| Glycerol 3-phosphate-4TMS ( $\times 10^{-1}$ ) | Urinary | 0.699 | 0.625 | 3.70 (1.68–4.43)    | 2.51 (1.28–4.74)   | 2.46 (1.48–3.44)  | 0.918 | 0.348        |
| Glycine-3TMS                                   | Urinary | 1.047 | 1.229 | 17.50 (12.37–28.87) | 11.84 (8.86–25.98) | 8.68 (6.68–18.71) | 0.337 | 0.217        |
| Glycolic acid-2TMS                             | Urinary | 0.979 | 0.444 | 1.48 (0.87–2.38)    | 1.17 (0.83–1.61)   | 1.43 (1.01–1.87)  | 0.428 | 0.994        |
| Glycyl-Glycine-4TMS                            | Urinary | 1.301 | 1.111 | 0 (0–0)             | 0 (0–0)            | 0 (0–0)           | 0.309 | 0.331        |
| Guanine-3TMS ( $\times 10^{-2}$ )              | Urinary | 0.791 | 1.745 | 7.87 (4.98–11.56)   | 6.67 (3.47–11.63)  | 4.37 (1.68–7.72)  | 0.644 | 0.087        |
| Hippuric acid-TMS                              | Urinary | 1.333 | 0.07  | 2.62 (0.77–5.62)    | 1.53 (0.73–3.83)   | 1.19 (0.35–3.44)  | 0.756 | 0.755        |
| Histidine-3TMS                                 | Urinary | 1.038 | 1.01  | 5.36 (3.09–10.60)   | 2.36 (1.49–6.11)   | 1.39 (0.54–5.01)  | 0.258 | 0.157        |
| Homocysteine-3TMS ( $\times 10^{-2}$ )         | Urinary | 1.313 | 0.584 | 2.19 (0–3.95)       | 1.17 (0–1.90)      | 0.27 (0–1.03)     | 0.519 | 0.263        |
| Homogentisic acid-3TMS ( $\times 10^{-3}$ )    | Urinary | 1.254 | 1.05  | 0 (0–0)             | 0 (0–2.12)         | 0 (0–0)           | 0.216 | 0.304        |
| Homovanillic acid-2TMS ( $\times 10^{-2}$ )    | Urinary | 0.72  | 0.253 | 3.02 (0.74–5.28)    | 2.40 (1.10–4.22)   | 1.62 (0.80–4.26)  | 0.99  | 0.677        |
| Hydroquinone-2TMS ( $\times 10^{-2}$ )         | Urinary | 0.432 | 0.206 | 0 (0–1.63)          | 0 (0–1.19)         | 0 (0–1.42)        | 0.997 | 0.991        |
| Hydroxylamine-3TMS                             | Urinary | 1.83  | 1.883 | 0.67 (0.50–0.79)    | 0.89 (0.63–1.07)   | 0.92 (0.75–1.04)  | 0.101 | <b>0.006</b> |
| Hypotaurine-3TMS ( $\times 10^{-2}$ )          | Urinary | 1.652 | 1.534 | 0 (0–0.68)          | 0 (0–6.53)         | 2.31 (0–6.42)     | 0.17  | 0.069        |
| Hypoxanthine-2TMS ( $\times 10^{-1}$ )         | Urinary | 0.618 | 0.93  | 2.92 (1.82–3.97)    | 1.32 (2.17–4.23)   | 1.68 (0.83–3.16)  | 0.979 | 0.24         |

|                                               |         |       |       |                  |                  |                  |       |       |
|-----------------------------------------------|---------|-------|-------|------------------|------------------|------------------|-------|-------|
| Indol-3-acetic acid-TMS ( $\times 10^{-2}$ )  | Urinary | 0.822 | 0.837 | 1.50 (0.59–4.03) | 1.75 (0–2.89)    | 2.75 (0–4.98)    | 0.999 | 0.751 |
| Inositol-6TMS ( $\times 10^{-1}$ )            | Urinary | 1.217 | 0.852 | 2.30 (1.77–3.00) | 3.21 (1.97–4.28) | 2.41 (1.55–3.87) | 0.396 | 0.999 |
| Isobutyrylglycine-TMS                         | Urinary | 0.618 | 0.354 | 0 (0–0)          | 0 (0–0)          | 0 (0–0)          | 0.992 | 0.928 |
| Isocitric acid-4TMS                           | Urinary | 0.558 | 0.556 | 4.63 (2.14–5.84) | 3.16 (2.43–5.84) | 2.81 (1.94–5.18) | 0.979 | 0.864 |
| Isoleucine-2TMS ( $\times 10^{-1}$ )          | Urinary | 0.78  | 0.977 | 3.47 (2.91–4.82) | 3.66 (1.69–4.78) | 1.83 (1.16–4.03) | 0.942 | 0.24  |
| Isovalerylglycine-TMS ( $\times 10^{-3}$ )    | Urinary | 1.017 | 0.546 | 0 (0–2.37)       | 0 (0–0)          | 0 (0–0)          | 0.434 | 0.476 |
| Kynurenic acid-2TMS ( $\times 10^{-1}$ )      | Urinary | 1.396 | 1.255 | 1.73 (0.65–3.32) | 1.33 (0.71–1.95) | 1.03 (0.71–1.61) | 0.569 | 0.483 |
| Kynurenine-2TMS ( $\times 10^{-1}$ )          | Urinary | 0.723 | 0.805 | 0.98 (0.36–1.29) | 0.71 (0.47–1.25) | 0.39 (0.20–0.70) | 0.999 | 0.176 |
| Lactic acid-2TMS                              | Urinary | 1.177 | 1.584 | 0.69 (0.55–0.91) | 0.92 (0.63–1.11) | 1.00 (0.69–1.20) | 0.213 | 0.067 |
| Lactose-meto-8TMS ( $\times 10^{-2}$ )        | Urinary | 1.283 | 1.223 | 2.44 (0.84–9.05) | 1.85 (1.32–5.05) | 1.34 (0.63–4.37) | 0.827 | 0.429 |
| Lauric acid-TMS ( $\times 10^{-1}$ )          | Urinary | 0.967 | 0.626 | 0.87 (0.68–0.99) | 0.79 (0.69–1.24) | 0.88 (0.68–0.99) | 0.89  | 0.945 |
| Leucine-2TMS                                  | Urinary | 0.756 | 0.885 | 1.21 (0.88–1.49) | 0.98 (0.52–1.50) | 0.66 (0.44–1.46) | 0.89  | 0.447 |
| Linoleic acid-TMS ( $\times 10^{-2}$ )        | Urinary | 0.592 | 0.438 | 1.57 (1.48–2.28) | 1.68 (1.25–2.10) | 1.55 (1.21–2.04) | 0.606 | 0.558 |
| Lysine-4TMS ( $\times 10^{-1}$ )              | Urinary | 0.551 | 0.568 | 4.93 (1.98–6.30) | 4.63 (2.66–8.84) | 1.80 (1.16–4.84) | 0.942 | 0.319 |
| Lyxose-meto-4TMS ( $\times 10^{-1}$ )         | Urinary | 0.483 | 1.062 | 4.03 (2.30–6.39) | 4.33 (2.50–5.43) | 2.94 (2.45–3.58) | 0.99  | 0.264 |
| Maleic acid-2TMS ( $\times 10^{-2}$ )         | Urinary | 0.964 | 1.25  | 4.10 (1.91–5.35) | 3.21 (1.76–5.39) | 2.58 (1.56–4.55) | 0.999 | 0.716 |
| Malic acid-3TMS ( $\times 10^{-2}$ )          | Urinary | 0.911 | 0.891 | 0 (0–1.25)       | 0.67 (0–1.21)    | 0.43 (0–1.01)    | 0.715 | 0.866 |
| Malonic acid-2TMS ( $\times 10^{-2}$ )        | Urinary | 1.701 | 0.477 | 1.27 (1.01–2.03) | 2.19 (1.68–2.94) | 1.30 (0.85–1.59) | 0.062 | 0.984 |
| Mannitol-6TMS                                 | Urinary | 0.927 | 0.724 | 1.25 (1.09–2.68) | 1.93 (0.87–3.10) | 1.30 (0.70–2.84) | 0.998 | 0.716 |
| Mannose-meto-5TMS ( $\times 10^{-1}$ )        | Urinary | 0.72  | 0.566 | 0.43 (0.20–0.69) | 0.68 (0.48–1.22) | 0.59 (0.28–0.88) | 0.175 | 0.637 |
| Margaric acid-TMS ( $\times 10^{-2}$ )        | Urinary | 0.705 | 0.419 | 2.69 (2.43–3.56) | 2.67 (2.07–3.29) | 2.64 (2.17–3.43) | 0.827 | 0.755 |
| Mesaconic acid-2TMS ( $\times 10^{-1}$ )      | Urinary | 1.425 | 0.763 | 0.85 (0.48–1.15) | 1.29 (0.55–1.93) | 0.78 (0.60–1.84) | 0.366 | 0.923 |
| meso-Erythritol-4TMS ( $\times 10^{-1}$ )     | Urinary | 0.955 | 0.576 | 2.95 (1.83–4.22) | 3.81 (2.04–4.37) | 2.05 (1.50–3.12) | 0.827 | 0.558 |
| Methionine sulfone-2TMS ( $\times 10^{-2}$ )  | Urinary | 0.863 | 1.097 | 1.51 (0.96–2.67) | 1.53 (0.62–2.54) | 0.80 (0–2.18)    | 0.99  | 0.197 |
| Methionine-2TMS ( $\times 10^{-2}$ )          | Urinary | 0.876 | 1.042 | 0 (0–1.63)       | 0 (0–1.13)       | 0 (0–0.76)       | 0.792 | 0.528 |
| Methylmalonic acid-2TMS ( $\times 10^{-2}$ )  | Urinary | 0.551 | 0.987 | 3.38 (2.59–5.55) | 4.03 (2.83–5.84) | 3.49 (2.67–4.19) | 0.89  | 0.864 |
| Methylsuccinic acid-2TMS ( $\times 10^{-2}$ ) | Urinary | 0.272 | 0.835 | 3.09 (2.12–4.06) | 3.39 (2.46–5.23) | 5.46 (2.27–7.31) | 0.89  | 0.413 |
| Myristic acid-TMS ( $\times 10^{-1}$ )        | Urinary | 0.569 | 0.284 | 1.23 (1.08–1.82) | 1.18 (0.89–1.63) | 1.26 (1.07–1.65) | 0.606 | 0.999 |
| N6-Acetyllysine-2TMS ( $\times 10^{-1}$ )     | Urinary | 0.567 | 0.832 | 2.45 (1.86–2.87) | 2.05 (1.12–3.37) | 1.13 (0.42–3.52) | 0.99  | 0.319 |

|                                                    |         |       |       |                    |                     |                    |              |              |
|----------------------------------------------------|---------|-------|-------|--------------------|---------------------|--------------------|--------------|--------------|
| N-Acetylaspartic acid-3TMS ( $\times 10^{-1}$ )    | Urinary | 1.21  | 1.46  | 1.88 (0.78–3.03)   | 1.18 (0.67–1.93)    | 0.70 (0.32–1.12)   | 0.497        | 0.077        |
| N-Acetylglutamine-2TMS ( $\times 10^{-2}$ )        | Urinary | 0.846 | 1.224 | 2.59 (0.75–3.71)   | 1.43 (0–2.96)       | 1.39 (0.85–2.80)   | 0.39         | 0.518        |
| N-Acetylmannosamine-meto-4TMS ( $\times 10^{-2}$ ) | Urinary | 0.808 | 0.661 | 4.26 (2.24–6.18)   | 3.53 (2.50–4.32)    | 3.14 (1.59–4.90)   | 0.682        | 0.716        |
| N-Acetylneuraminic acid-6TMS ( $\times 10^{-1}$ )  | Urinary | 0.794 | 0.63  | 1.62 (0.77–2.51)   | 1.25 (0.90–1.81)    | 0.98 (0.57–1.65)   | 0.979        | 0.413        |
| N-Acetylserine-2TMS ( $\times 10^{-2}$ )           | Urinary | 0.49  | 0.631 | 1.15 (0–1.24)      | 0.42 (0–1.09)       | 0.83 (0–1.16)      | 0.594        | 0.624        |
| N-Acetyltyrosine-2TMS                              | Urinary | 1.052 | 0.598 | 0 (0–0)            | 0 (0–0)             | 0 (0–0)            | 0.483        | 0.706        |
| Niacinamide-TMS ( $\times 10^{-1}$ )               | Urinary | 0.87  | 0.637 | 0.65 (0.43–1.31)   | 0.89 (0.49–1.50)    | 0.75 (0.35–1.01)   | 0.606        | 0.999        |
| Nicotinic acid-TMS ( $\times 10^{-2}$ )            | Urinary | 2.023 | 2.303 | 0.99 (0.35–1.37)   | 3.58 (1.57–7.82)    | 6.45 (2.19–10.18)  | <b>0.031</b> | <b>0.001</b> |
| Nonanoic acid-TMS ( $\times 10^{-1}$ )             | Urinary | 1.257 | 1.255 | 3.10 (2.53–3.65)   | 3.53 (2.88–4.15)    | 3.50 (2.97–3.98)   | 0.337        | 0.176        |
| Norepinephrine-5TMS ( $\times 10^{-1}$ )           | Urinary | 0.804 | 0.396 | 1.18 (0.58–2.20)   | 1.15 (0.82–1.41)    | 1.58 (0.68–2.18)   | 0.999        | 0.716        |
| Norvaline-2TMS ( $\times 10^{-2}$ )                | Urinary | 0.368 | 0.796 | 0 (0–1.01)         | 0 (0–1.55)          | 0 (0–0.80)         | 0.987        | 0.852        |
| Octadecanol-TMS ( $\times 10^{-1}$ )               | Urinary | 0.41  | 1.224 | 2.24 (2.02–2.98)   | 2.33 (1.88–3.00)    | 2.04 (1.91–2.38)   | 0.998        | 0.217        |
| Octanoic acid-TMS ( $\times 10^{-2}$ )             | Urinary | 0.772 | 0.603 | 5.34 (4.88–7.17)   | 6.63 (5.14–7.65)    | 5.85 (5.03–7.18)   | 0.719        | 0.716        |
| Oleamide-TMS ( $\times 10^{-1}$ )                  | Urinary | 0.904 | 0.43  | 2.54 (1.99–4.26)   | 3.01 (1.83–4.38)    | 2.40 (1.40–3.21)   | 0.998        | 0.52         |
| Oleic acid-TMS ( $\times 10^{-1}$ )                | Urinary | 0.94  | 0.4   | 1.22 (1.09–1.35)   | 0.98 (0.59–1.51)    | 0.95 (0.77–1.76)   | 0.157        | 0.52         |
| O-Phosphoethanolamine-4TMS                         | Urinary | 0.723 | 0.849 | 0 (0–0)            | 0 (0–0)             | 0 (0–0)            | 0.808        | 0.768        |
| Ornithine-4TMS ( $\times 10^{-1}$ )                | Urinary | 1.355 | 0.761 | 4.07 (2.01–4.89)   | 4.34 (2.56–6.78)    | 2.39 (1.44–5.05)   | 0.428        | 0.677        |
| Oxalic acid-2TMS ( $\times 10^{-1}$ )              | Urinary | 0.935 | 0.951 | 3.75 (2.65–4.06)   | 3.78 (3.06–4.63)    | 4.02 (3.04–4.19)   | 0.682        | 0.413        |
| Palmitic acid-TMS                                  | Urinary | 0.442 | 1.021 | 3.32 (3.03–4.19)   | 3.37 (2.52–4.22)    | 3.04 (2.73–3.73)   | 0.827        | 0.264        |
| Palmitoleic acid-TMS ( $\times 10^{-2}$ )          | Urinary | 1.027 | 0.671 | 1.57 (0.76–2.11)   | 0.80 (0.26–1.63)    | 1.24 (0.91–2.87)   | 0.394        | 0.999        |
| Pantothenic acid-3TMS ( $\times 10^{-2}$ )         | Urinary | 0.487 | 0.889 | 1.51 (0.60–2.83)   | 0.79 (0–3.07)       | 1.09 (0–1.42)      | 0.66         | 0.497        |
| ParaXanthine-TMS ( $\times 10^{-2}$ )              | Urinary | 2.003 | 1.43  | 1.53 (0.33–3.38)   | 4.67 (2.68–9.04)    | 4.53 (1.64–8.11)   | <b>0.018</b> | 0.155        |
| Phenylalanine-2TMS                                 | Urinary | 0.909 | 1.219 | 1.79 (1.28–2.10)   | 1.44 (0.78–1.88)    | 0.82 (0.66–1.89)   | 0.428        | 0.24         |
| Phenylpyruvic acid-meto-TMS                        | Urinary | 0     | 0.803 | 0 (0–0)            | 0 (0–0)             | 0 (0–0)            | 0.999        | 0.706        |
| Phosphoric acid-3TMS                               | Urinary | 0.982 | 0.412 | 120.0 (94.3–175.1) | 152.4 (104.1–184.4) | 130.6 (99.8–158.7) | 0.606        | 0.999        |
| Pimelic acid-2TMS ( $\times 10^{-2}$ )             | Urinary | 0.908 | 0.864 | 0 (0–0)            | 0 (0–1.03)          | 0 (0–0.54)         | 0.511        | 0.418        |
| Proline-2TMS ( $\times 10^{-2}$ )                  | Urinary | 0.882 | 0.68  | 4.53 (1.85–6.15)   | 5.17 (2.68–6.44)    | 3.20 (1.72–6.76)   | 0.756        | 0.923        |
| Protocatechuic acid-3TMS ( $\times 10^{-3}$ )      | Urinary | 1.11  | 1.529 | 0 (0–2.57)         | 0 (0–0)             | 0 (0–0)            | 0.325        | 0.106        |
| Psicose-meto-5TMS ( $\times 10^{-1}$ )             | Urinary | 1.242 | 1.545 | 2.74 (0.49–1.07)   | 1.59 (12.6–5.47)    | 1.34 (0.73–2.94)   | 0.918        | 0.637        |



|                                                   |         |       |       |                   |                   |                  |       |              |
|---------------------------------------------------|---------|-------|-------|-------------------|-------------------|------------------|-------|--------------|
| Putrescine-4TMS ( $\times 10^{-1}$ )              | Urinary | 1.108 | 0.524 | 1.25 (0.64–1.93)  | 1.36 (0.97–1.99)  | 1.42 (0.85–1.93) | 0.682 | 0.984        |
| Pyridoxal-meto-2TMS                               | Urinary | 1.221 | 0.505 | 0 (0–0)           | 0 (0–0)           | 0 (0–0)          | 0.861 | 0.928        |
| Pyrogallol-3TMS ( $\times 10^{-1}$ )              | Urinary | 1.285 | 1.33  | 0.78 (0.32–11.28) | 0.98 (0.30–3.58)  | 0.52 (0.12–1.33) | 0.999 | 0.412        |
| Pyruvic acid-meto-TMS ( $\times 10^{-1}$ )        | Urinary | 0.861 | 0.605 | 2.90 (1.62–3.89)  | 3.22 (2.32)       | 3.01 (2.10–3.67) | 0.942 | 0.984        |
| Quinolinic acid-2TMS ( $\times 10^{-1}$ )         | Urinary | 1.222 | 0.962 | 4.18 (2.30–6.91)  | 3.64 (2.36–3.85)  | 2.91 (2.22–5.07) | 0.644 | 0.677        |
| Ribitol-5TMS ( $\times 10^{-1}$ )                 | Urinary | 0.856 | 0.645 | 1.02 (0.66–1.56)  | 1.06 (0.53–1.42)  | 0.61 (0.41–0.99) | 0.99  | 0.195        |
| Ribonic acid-5TMS                                 | Urinary | 0.711 | 0.625 | 1.70 (1.07–2.38)  | 1.47 (1.24–2.10)  | 1.08 (0.72–1.56) | 0.606 | 0.24         |
| Ribonolactone-3TMS ( $\times 10^{-2}$ )           | Urinary | 1.036 | 0.724 | 6.60 (4.05–9.89)  | 5.81 (3.37–8.16)  | 5.14 (2.94–8.51) | 0.756 | 0.83         |
| Ribose 5-phosphate-meto-5TMS ( $\times 10^{-3}$ ) | Urinary | 0.94  | 0.575 | 0 (0–8.05)        | 0 (0–2.90)        | 0 (0–0)          | 0.55  | 0.26         |
| Ribose-meto-4TMS ( $\times 10^{-1}$ )             | Urinary | 0.661 | 0.902 | 0.91 (0.55–1.51)  | 1.00 (0.67–1.25)  | 0.69 (0.54–0.95) | 0.979 | 0.291        |
| Ribulose-meto-4TMS ( $\times 10^{-1}$ )           | Urinary | 0.687 | 0.958 | 2.23 (0.97–3.25)  | 1.99 (1.19–3.25)  | 1.31 (0.93–2.03) | 0.979 | 0.52         |
| Saccharopine-4TMS                                 | Urinary | 0     | 0.803 | 0 (0–0)           | 0 (0–0)           | 0 (0–0)          | 0.999 | 0.706        |
| Sebacic acid-2TMS                                 | Urinary | 1.047 | 0.862 | 0 (0–0)           | 0 (0–0)           | 0 (0–0)          | 0.719 | 0.463        |
| Serine-3TMS                                       | Urinary | 0.871 | 1.205 | 1.73 (1.46–3.64)  | 1.78 (1.14–3.57)  | 1.24 (0.67–2.29) | 0.827 | 0.264        |
| Sorbitol-6TMS ( $\times 10^{-1}$ )                | Urinary | 1.121 | 0.609 | 4.53 (3.23–7.23)  | 4.53 (3.23–7.23)  | 3.27 (2.49–3.79) | 0.962 | <b>0.029</b> |
| Sorbose-meto-5TMS ( $\times 10^{-2}$ )            | Urinary | 0.347 | 1.493 | 3.87 (1.89–12.82) | 3.82 (2.43–9.62)  | 2.78 (1.32–5.78) | 0.962 | 0.319        |
| Spermidine-5TMS ( $\times 10^{-3}$ )              | Urinary | 0.657 | 0.159 | 0 (0–8.54)        | 0 (0–0)           | 0 (0–0)          | 0.78  | 0.995        |
| Spermine-6TMS ( $\times 10^{-1}$ )                | Urinary | 0.813 | 0.679 | 1.04 (0.64–1.35)  | 1.14 (0.48–1.36)  | 0.80 (0.38–1.64) | 0.999 | 0.558        |
| Stearic acid-TMS                                  | Urinary | 0.448 | 0.509 | 2.45 (2.40–3.20)  | 2.62 (2.26–3.17)  | 2.50 (2.17–3.36) | 0.999 | 0.994        |
| Suberic acid-2TMS ( $\times 10^{-2}$ )            | Urinary | 1.089 | 0.912 | 0 (0–0.46)        | 0.73 (0–3.06)     | 0.90 (0–1.88)    | 0.341 | 0.145        |
| Succinic acid-2TMS ( $\times 10^{-1}$ )           | Urinary | 1.239 | 0.238 | 0.95 (0.75–1.28)  | 0.91 (0.73–1.09)  | 0.95 (0.65–1.17) | 0.827 | 0.923        |
| Sucrose-8TMS                                      | Urinary | 2.17  | 2.131 | 1.08 (0.04–1.20)  | 0.17 (0.14–0.37)  | 0.19 (0.09–0.27) | 0.428 | 0.52         |
| Tagatose-meto-5TMS ( $\times 10^{-1}$ )           | Urinary | 1.299 | 1.641 | 0.93 (0.10–1.37)  | 0.37 (0.16–1.37)  | 0.27 (0.18–0.67) | 0.719 | 0.447        |
| Tartaric acid-4TMS                                | Urinary | 0.639 | 0.646 | 0.12 (0.02–1.01)  | 0.15 (0.06–1.31)  | 0.13 (0.08–0.54) | 0.719 | 0.984        |
| Taurine-13C2-3TMS ( $\times 10^{-1}$ )            | Urinary | 0.376 | 0.56  | 0.49 (0.23–0.88)  | 0.68 (0.25–1.19)  | 0.51 (0.31–1.12) | 0.827 | 0.793        |
| Thiodiglycolic acid-2TMS ( $\times 10^{-3}$ )     | Urinary | 1.475 | 0.784 | 0 (0–6.60)        | 0 (0–0)           | 0 (0–0)          | 0.21  | 0.148        |
| Threitol-4TMS ( $\times 10^{-1}$ )                | Urinary | 0.948 | 1.058 | 1.25 (0.53–2.51)  | 1.71 (1.12–2.17)  | 1.07 (0.66–1.38) | 0.644 | 0.598        |
| Threonic acid-4TMS                                | Urinary | 0.762 | 0.749 | 2.04 (1.01–2.54)  | 1.53 (1.03–2.21)  | 1.24 (0.79–2.26) | 0.606 | 0.598        |
| Threonine-3TMS ( $\times 10^{-1}$ )               | Urinary | 0.831 | 0.883 | 3.56 (2..69–5.23) | 3.31 (2.21–0.601) | 2.67 (1.40–4.45) | 0.998 | 0.291        |

|                                                |         |       |       |                     |                     |                     |       |       |
|------------------------------------------------|---------|-------|-------|---------------------|---------------------|---------------------|-------|-------|
| Tiglylglycine-TMS                              | Urinary | 0.675 | 0.419 | 0 (0–0)             | 0 (0–0)             | 0 (0–0)             | 0.861 | 0.928 |
| Trehalose-8TMS ( $\times 10^{-2}$ )            | Urinary | 1.281 | 0.999 | 1.48 (0–16.58)      | 2.33 (0–6.08)       | 2.07 (1.29–7.76)    | 0.978 | 0.947 |
| Triethanolamine-3TMS ( $\times 10^{-2}$ )      | Urinary | 0.631 | 1.071 | 0 (0–1.51)          | 0 (0–2.90)          | 0 (0–0)             | 0.669 | 0.617 |
| Tryptophan-3TMS ( $\times 10^{-1}$ )           | Urinary | 1.07  | 0.597 | 1.47 (1.14–1.73)    | 1.87 (0.93–2.30)    | 0.88 (0.54–2.57)    | 0.532 | 0.348 |
| Tyramine-3TMS ( $\times 10^{-1}$ )             | Urinary | 1.111 | 1.738 | 3.74 (1.94–7.25)    | 2.96 (1.77–4.60)    | 1.85 (1.12–3.42)    | 0.682 | 0.099 |
| Tyrosine-3TMS                                  | Urinary | 0.671 | 0.783 | 3.92 (2.29–5.77)    | 3.44 (1.77–5.18)    | 1.90 (1.27–5.66)    | 0.86  | 0.291 |
| Uracil-2TMS ( $\times 10^{-2}$ )               | Urinary | 1.013 | 1.56  | 0.59 (0–1.71)       | 0.58 (0–1.02)       | 0 (0–0.67)          | 0.836 | 0.154 |
| Urea-2TMS                                      | Urinary | 0.708 | 0.503 | 172.1 (150.3–237.0) | 201.6 (169.0–250.2) | 197.6 (144.0–263.1) | 0.86  | 0.968 |
| Ureidopropionic acid-2TMS ( $\times 10^{-3}$ ) | Urinary | 0.643 | 0.498 | 8.46 (0–9.92)       | 0 (0–4.31)          | 0 (0–10.97)         | 0.252 | 0.799 |
| Uric acid-4TMS                                 | Urinary | 0.727 | 0.446 | 4.48 (3.00–7.53)    | 3.59 (3.12–4.86)    | 4.70 (3.00–10.66)   | 0.644 | 0.948 |
| Urocanic acid-2TMS ( $\times 10^{-1}$ )        | Urinary | 0.428 | 1.302 | 2.08 (1.03–2.54)    | 1.52 (1.09–1.97)    | 1.12 (0.88–1.47)    | 0.644 | 0.141 |
| Valine-2TMS                                    | Urinary | 0.72  | 1.151 | 1.64 (1.11–1.91)    | 1.52 (0.85–1.80)    | 0.97 (0.71–1.72)    | 0.89  | 0.291 |
| Vanilmandelic acid-3TMS ( $\times 10^{-1}$ )   | Urinary | 0.836 | 0.599 | 5.52 (2.29–8.37)    | 1.98 (2.93–6.07)    | 4.47 (2.66–5.57)    | 0.756 | 0.716 |
| Xanthine-3TMS ( $\times 10^{-1}$ )             | Urinary | 0.887 | 0.611 | 0.54 (0.37–1.33)    | 0.66 (0.37–1.24)    | 0.39 (0.29–0.80)    | 0.918 | 0.558 |
| Xanthosine-5TMS ( $\times 10^{-2}$ )           | Urinary | 0.975 | 0.663 | 1.08 (0.27–1.43)    | 1.03 (0–1.69)       | 0.49 (0–1.14)       | 0.998 | 0.432 |
| Xylitol-5TMS ( $\times 10^{-1}$ )              | Urinary | 1.039 | 0.663 | 1.37 (0.64–2.22)    | 1.12 (0.80–1.74)    | 0.90 (0.61–1.42)    | 0.998 | 0.483 |
| Xylose-meto-4TMS ( $\times 10^{-1}$ )          | Urinary | 1.525 | 0.661 | 1.20 (0.36–1.65)    | 1.45 (0.89–2.74)    | 0.80 (0.49–1.58)    | 0.283 | 0.968 |
| Xylulose-meto-4TMS ( $\times 10^{-1}$ )        | Urinary | 0.712 | 1.014 | 3.05 (1.05–3.57)    | 2.48 (1.64–3.28)    | 1.66 (1.24–2.37)    | 0.979 | 0.558 |

Abbreviations: IQR, Interquartile range; arb.unit, arbitrary unit; VIP, variable importance for projection; AHU, asymptomatic hyperuricemia; SUA, serum urate level; TMS, tetramethylsilane. VIP<sup>1</sup> value was obtained from PLS regression analysis distinguished gout with SUA <9.0 mg/dL from asymptomatic hyperuricemia. VIP<sup>2</sup> value was obtained from PLS regression analysis distinguished gout with SUA ≥9.0 mg/dL from asymptomatic hyperuricemia. Raw P<sup>3</sup> and P<sup>4</sup> values were calculated from Steel with control tests comparing asymptomatic hyperuricemia to gout with SUA <9.0 mg/dL, and asymptomatic hyperuricemia to gout with SUA ≥9.0 mg/dL, respectively (without the Benjamini-Hochberg adjustment).

**Table S3. Summary of pathway analysis using potential biomarkers distinguishing overall gout and asymptomatic hyperuricemia groups.**

| Metabolism                                  | Raw p                 | $-\log_{10}(p)$ | Adjusted <i>p</i> | $-\log_{10}(\text{adjusted } p)$ | Impact |
|---------------------------------------------|-----------------------|-----------------|-------------------|----------------------------------|--------|
| Citrate cycle (TCA cycle)                   | $3.33 \times 10^{-5}$ | 4.477           | 0.003             | 2.553                            | 0.200  |
| Glycolysis / Gluconeogenesis                | 0.002                 | 2.692           | 0.057             | 1.247                            | 0.101  |
| Alanine, aspartate and glutamate metabolism | 0.003                 | 2.597           | 0.057             | 1.247                            | 0.135  |
| Taurine and hypotaurine metabolism          | 0.003                 | 2.569           | 0.057             | 1.247                            | 0.286  |
| Glyoxylate and dicarboxylate metabolism     | 0.004                 | 2.428           | 0.063             | 1.203                            | 0.024  |
| Butanoate metabolism                        | 0.010                 | 2.013           | 0.136             | 0.867                            | 0.032  |
| Pyruvate metabolism                         | 0.020                 | 1.689           | 0.246             | 0.610                            | 0.207  |
| Glutathione metabolism                      | 0.032                 | 1.491           | 0.339             | 0.470                            | 0.011  |
| Glycine, serine and threonine metabolism    | 0.044                 | 1.359           | 0.368             | 0.434                            | 0.000  |
| Cysteine and methionine metabolism          | 0.044                 | 1.359           | 0.368             | 0.434                            | 0.096  |
| Biosynthesis of unsaturated fatty acids     | 0.051                 | 1.290           | 0.391             | 0.408                            | 0.000  |
| Arginine and proline metabolism             | 0.057                 | 1.247           | 0.391             | 0.408                            | 0.024  |
| D-Glutamine and D-glutamate metabolism      | 0.060                 | 1.219           | 0.391             | 0.408                            | 0.000  |
| Thiamine metabolism                         | 0.070                 | 1.154           | 0.421             | 0.376                            | 0.000  |
| Aminoacyl-tRNA biosynthesis                 | 0.086                 | 1.068           | 0.479             | 0.320                            | 0.000  |
| Caffeine metabolism                         | 0.099                 | 1.005           | 0.519             | 0.285                            | 0.692  |
| Arginine biosynthesis                       | 0.136                 | 0.867           | 0.671             | 0.173                            | 0.000  |
| Nicotinate and nicotinamide metabolism      | 0.145                 | 0.839           | 0.675             | 0.170                            | 0.000  |
| Starch and sucrose metabolism               | 0.171                 | 0.766           | 0.756             | 0.122                            | 0.050  |
| Pantothenate and CoA biosynthesis           | 0.180                 | 0.745           | 0.756             | 0.122                            | 0.000  |

Pathway analysis of the potential biomarkers was applied within the MetaboAnalyst 5.0 (<https://www.metaboanalyst.ca>). Pathway analysis was performed using referred KEGG (<http://www.kegg.jp>) homo sapiens pathway library and using the Hypergeometric test. P-values were adjusted by the Benjamini-Hochberg method to control the false discovery rate (FDR).

**Table S4. Summary of pathway analysis using potential biomarkers distinguishing gout with SUA  $\geq 9.0$  mg/dL and asymptomatic hyperuricemia groups.**

| Metabolism                                  | Raw p                 | $-\log_{10}(p)$ | Adjusted p            | $-\log_{10}(\text{adjusted } p)$ | Impact |
|---------------------------------------------|-----------------------|-----------------|-----------------------|----------------------------------|--------|
| Citrate cycle (TCA cycle)                   | $1.38 \times 10^{-6}$ | 5.861           | $1.16 \times 10^{-4}$ | 3.937                            | 0.512  |
| Glyoxylate and dicarboxylate metabolism     | 0.000                 | 3.816           | 0.006                 | 2.223                            | 0.182  |
| Alanine, aspartate and glutamate metabolism | 0.000                 | 3.670           | 0.006                 | 2.223                            | 0.333  |
| Pyruvate metabolism                         | 0.001                 | 2.832           | 0.031                 | 1.509                            | 0.455  |
| Glycolysis or Gluconeogenesis               | 0.004                 | 2.449           | 0.060                 | 1.224                            | 0.200  |
| Arginine biosynthesis                       | 0.009                 | 2.069           | 0.118                 | 0.929                            | 0.115  |
| Butanoate metabolism                        | 0.010                 | 2.008           | 0.118                 | 0.929                            | 0.143  |
| Nicotinate and nicotinamide metabolism      | 0.020                 | 1.699           | 0.210                 | 0.678                            | 0.122  |
| Biosynthesis of unsaturated fatty acids     | 0.025                 | 1.606           | 0.231                 | 0.636                            | 0.043  |
| Glycine, serine and threonine metabolism    | 0.049                 | 1.310           | 0.398                 | 0.400                            | 0.045  |
| D-Glutamine and D-glutamate metabolism      | 0.052                 | 1.283           | 0.398                 | 0.400                            | 0.222  |
| Arginine and proline metabolism             | 0.063                 | 1.203           | 0.439                 | 0.358                            | 0.091  |
| Histidine metabolism                        | 0.158                 | 0.801           | 1.000                 | 0.000                            | 0.032  |
| Pantothenate and CoA biosynthesis           | 0.167                 | 0.777           | 1.000                 | 0.000                            | 0.030  |
| beta-Alanine metabolism                     | 0.211                 | 0.675           | 1.000                 | 0.000                            | 0.047  |
| Porphyrin and chlorophyll metabolism        | 0.249                 | 0.604           | 1.000                 | 0.000                            | 0.038  |
| Cysteine and methionine metabolism          | 0.319                 | 0.496           | 1.000                 | 0.000                            | 0.071  |
| Aminoacyl-tRNA biosynthesis                 | 0.331                 | 0.481           | 1.000                 | 0.000                            | 0.014  |
| Arachidonic acid metabolism                 | 0.356                 | 0.449           | 1.000                 | 0.000                            | 0.275  |
| Tyrosine metabolism                         | 0.380                 | 0.420           | 1.000                 | 0.000                            | 0.011  |

Pathway analysis of the potential biomarkers was applied within the MetaboAnalyst 5.0 (<https://www.metaboanalyst.ca>). Pathway analysis was performed using referred KEGG (<http://www.kegg.jp>) homo sapiens pathway library and using the Hypergeometric test. P-values were adjusted by the Benjamini-Hochberg method to control the false discovery rate (FDR).
